# Supplementary material for: Comparative analysis of cancer cell responses to targeted radionuclide therapy (TRT) and external beam radiotherapy (EBRT)
Source: PubMed Central journal article supplement (PMC9429584; doi:10.1186/s13045-022-01343-y), 2022-08-31
Supplement: 13045_2022_1343_MOESM1_ESM.pdf [file 13045_2022_1343_MOESM1_ESM.pdf]

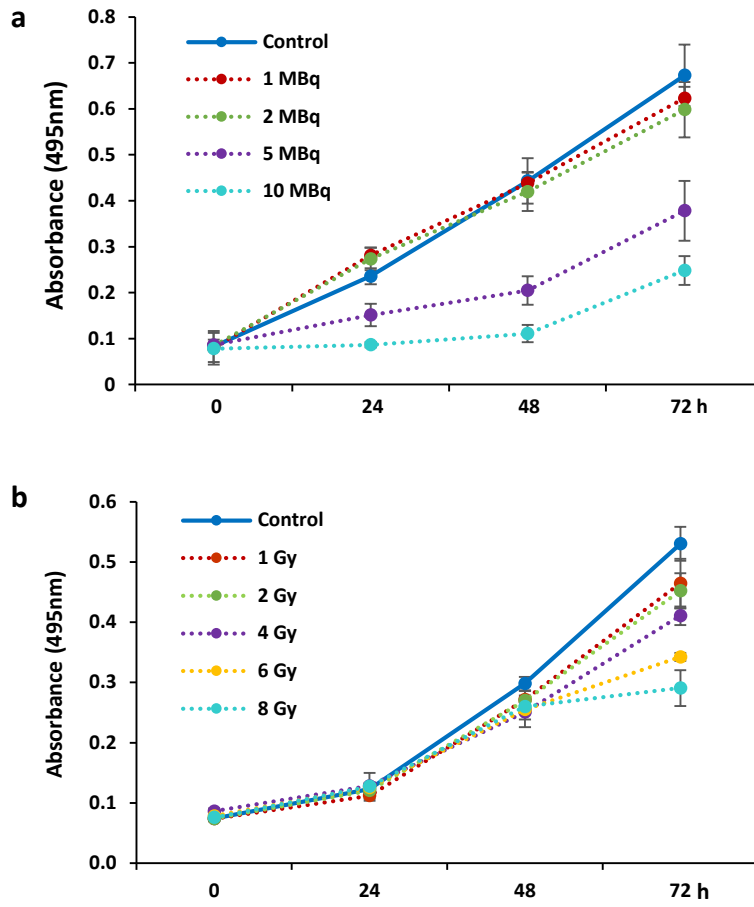

**Supplementary Figure S1. Analysis of cell proliferation in response to TRT and EBRT.** A431/CCKBR cell proliferation was analyzed 24, 48 and 72 h after treatment with [<sup>177</sup>Lu]Lu-PP-F11N (a) and EBRT (b), as indicated. Results were assayed in triplicate and data represent means ± SD.

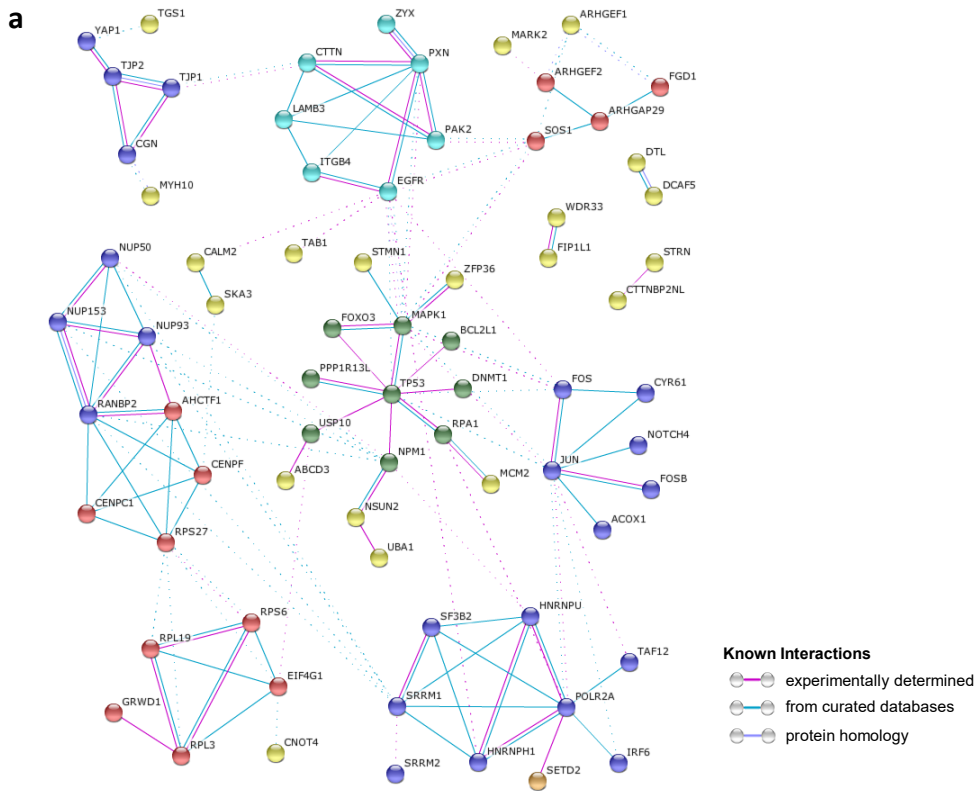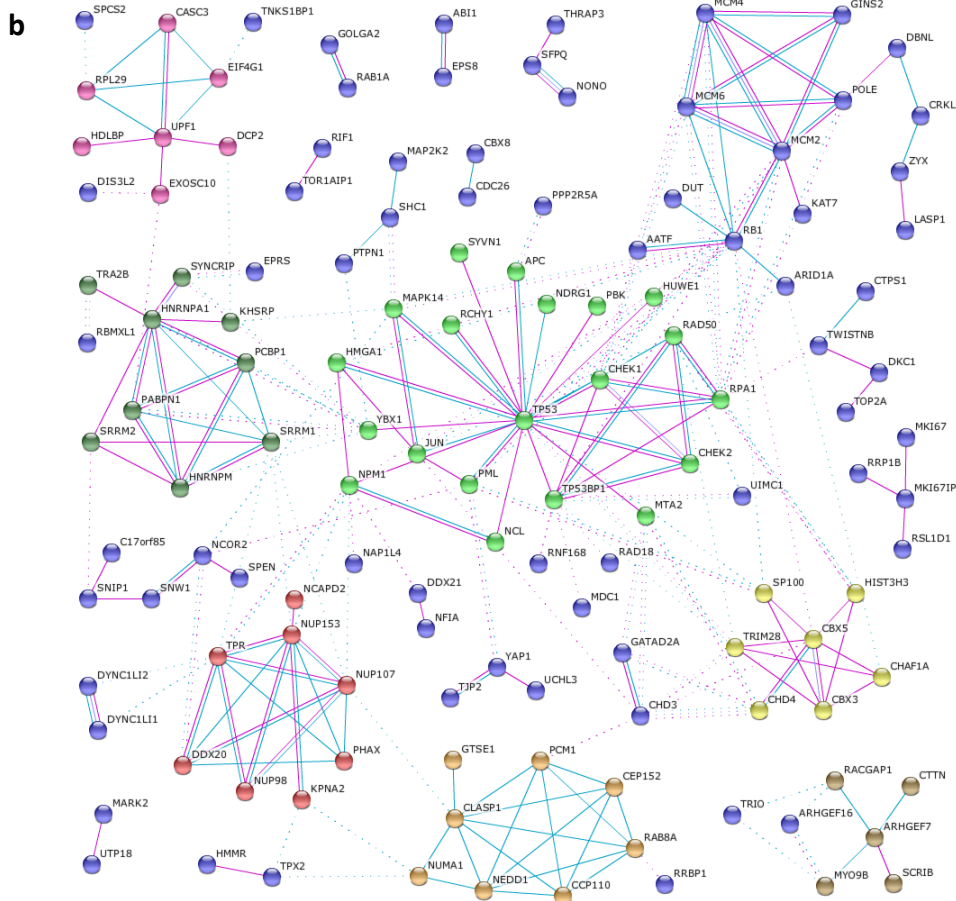

**Supplementary Figure S2. Cellular responses to TRT and EBRT.**

String interactom analysis of identified proteins with altered phosphorylation or protein level in response to TRT (a) and EBRT(b).

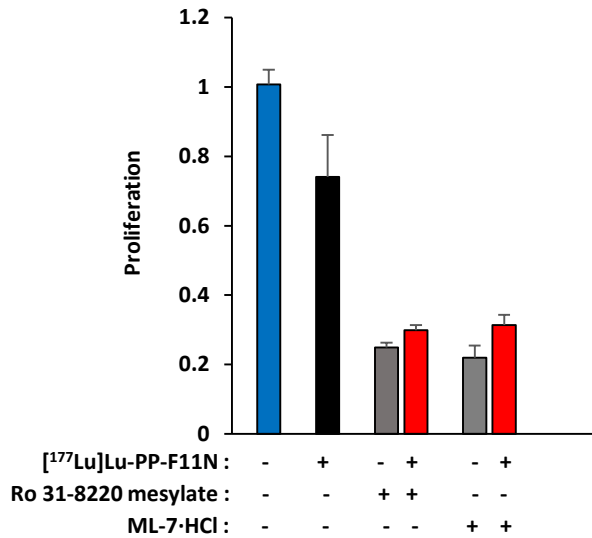

**Supplementary Figure S3. Analysis of A431/CCKBR cell proliferation in response to kinase inhibitors in combination with [<sup>177</sup>Lu]Lu-PP-F11N.** Cell proliferation 48 h after treatment with 10 μM Ro 31-8220 mesylate and ML-7-HCl alone or in combination with 5 MBq per ml of [<sup>177</sup>Lu]Lu-PP-F11N. Results were assayed in triplicate and data represent means ± SD.

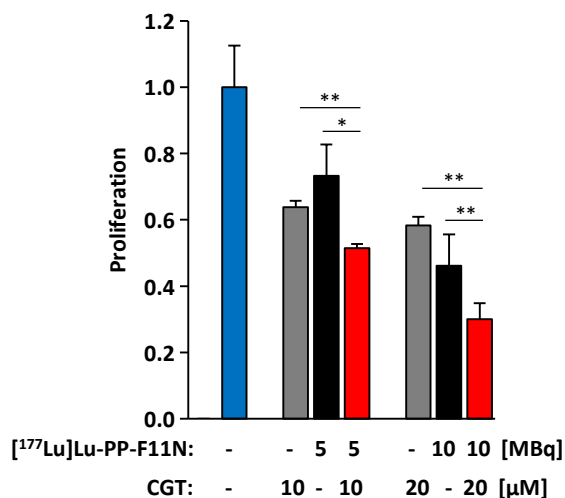

**Supplementary Figure S4. Validation of radiosensitizing targets to TRT.** A431/CCKBR cell proliferation was analyzed 48 h after treatment with 10 or 20 μM cilengitide (CGT) and/or 5 and 10 MBq per ml of [<sup>177</sup>Lu]Lu-PP-F11N, as indicated. Results were assayed in triplicate and proliferation in control untreated cells was set to 1. Data represent means ± SD. \**P* < 0.05, \*\**P* < 0.01

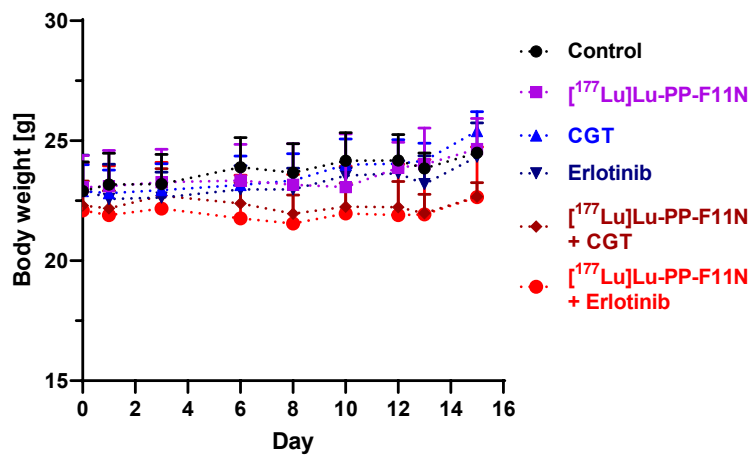

**Supplementary Figure S5. Body weight in treated mice.** Body weight of A431/CCKBR xenografted nude mice, in control and treatment groups. Values show mean  $\pm$  SD.
