# Supplementary material for: Comparative analysis of cancer cell responses to targeted radionuclide therapy (TRT) and external beam radiotherapy (EBRT)
Source: PubMed Central journal article supplement (PMC9429584; doi:10.1186/s13045-022-01343-y), 2022-08-31
Supplement: 13045_2022_1343_MOESM2_ESM.pdf [file 13045_2022_1343_MOESM2_ESM.pdf]

Supplementary Table S1

| LOG <sub>2</sub> (ratio)<br><sup>177</sup> Lu-PP-F11N<br>/CON | P-VALUE  | SYMBOL; NAME   UniProt                                                       | SEQUENCE WINDOW<br>POSITION (PROBABILITY>0.5) |
|---------------------------------------------------------------|----------|------------------------------------------------------------------------------|-----------------------------------------------|
| 7.85                                                          | 0.02107  | HNRPU; Heterogeneous nuclear ribonucleoprotein U   Q00839                    | SSS(1)PVNVK                                   |
| 7.17                                                          | 9.71E-05 | SRRM2; Serine/arginine repetitive matrix protein 2   Q9UQ35                  | RVPS(0.95)PTPAPK                              |
| 6.77                                                          | 3.79E-06 | RSL1D1; Ribosomal L1 domain-containing protein 1   O76021                    | EKS(1)PSLGKK                                  |
| 6.28                                                          | 0.00043  | DPM1; Dolichol-phosphate mannosyltransferase subunit 1   O60762              | ASLEVS(0.74)RSPPR                             |
| 4.88                                                          | 0.00062  | DNTTIP2; Deoxynucleotidyltransferase terminal-interacting protein 2   Q5QJE6 | WNNNKS(1)PIK                                  |
| 4.21                                                          | 0.00037  | TGS1; Trimethylguanosine synthase   Q96RS0                                   | DRPHASGT(0.98)DGDES(0.99)EEDPPEHKPSK          |
| 4.16                                                          | 0.00127  | SH2D5; SH2 domain-containing protein 5   Q6ZV89                              | LGNPYCS(0.94)PTLVRK                           |
| 4.11                                                          | 0.00054  | RPP30; Ribonuclease P protein subunit p30   P78346                           | KPRP5(1)EGDEDCLPASK                           |
| 4.04                                                          | 0.00174  | RAB11FIP1; Rab11 family-interacting protein 1   Q6WKZ4                       | TAS(0.99)TDLCK                                |
| 3.83                                                          | 0.00111  | TGS1; Trimethylguanosine synthase   Q96RS0                                   | DRPHASGT(0.91)DGDES(1)EEDPPEHKPSK             |
| 3.72                                                          | 0.00041  | WDR33; pre-mRNA 3' end processing protein WDR33   Q9C0J8                     | DTPRPDHPHDGHS(0.98)PASR                       |
| 3.70                                                          | 0.00024  | EIF4ENIF1; Eukaryotic translation initiation factor 4E transporter   B1AKL4  | SS(0.82)PVESLKK                               |
| 3.66                                                          | 0.00411  | ARHGEF1; Rho guanine nucleotide exchange factor 1   Q92888                   | QLLFPAEEDNGAGPPRDGDGVPGGGLS(1)PAR             |
| 3.42                                                          | 0.00036  | DENND4C; t DENN domain-containing protein 4C   R4GN35                        | RSS(0.77)LPDGHSPAQENPESEK                     |
| 3.41                                                          | 0.01414  | FIP1L1; Pre-mRNA 3'-end-processing factor FIP1   Q6UN15                      | ERDHS(0.99)PTSPVFN5(0.98)DEERYR               |
| 3.40                                                          | 9.73E-05 | TJP2; Tight junction protein ZO-2   Q9UDY2                                   | SFS(1)PEER                                    |
| 3.40                                                          | 0.00142  | TRA2A; Transformer-2 protein homolog alpha   Q13595                          | S(1)RS(1)HS(1)PMSNR                           |
| 3.37                                                          | 0.00098  | TRA2A; Transformer-2 protein homolog alpha   Q13595                          | S(1)RS(1)HS(0.99)PMSNR                        |
| 3.21                                                          | 0.00832  | WARS; Tryptophan-tRNA ligase, cytoplasmic   P23381                           | KLS(1)FDFQ                                    |
| 3.20                                                          | 0.00146  | TRA2A; Transformer-2 protein homolog alpha   Q13595                          | S(1)RS(1)HS(0.99)PMSNR                        |
| 3.12                                                          | 0.00101  | USP10; Ubiquitin carboxyl-terminal hydrolase 10   Q14694                     | LLS(0.99)PSNEK                                |
| 3.11                                                          | 5.25E-05 | TP53; Cellular tumor antigen p53sp   P04637                                  | LMFKTEGPD5(1)D                                |
| 3.10                                                          | 0.00066  | ITGB4; Integrin beta-4   P16144                                              | DYNS(0.59)LT(0.59)RS(0.59)EHSHTTLPR           |
| 2.98                                                          | 0.00540  | RPL19; Ribosomal protein L19   J3QR09                                        | TLS(1)KEEETKK                                 |
| 2.95                                                          | 0.00106  | FAM83B; Protein FAM83B   Q5T0W9                                              | S(1)FPLFDNSK                                  |
| 2.91                                                          | 0.00423  | ANLN; Actin-binding protein anillin   Q9NQW6                                 | TQS(1)LPVTEK                                  |
| 2.68                                                          | 9.87E-05 | ZFP36; Tristetraprolin   P26651                                              | STS(0.99)LVEGR                                |
| 2.37                                                          | 0.01377  | FOS; Proto-oncogene c-Fos   P01100                                           | GKVEQLS(1)PEEEEK                              |
| 2.37                                                          | 0.00047  | PAK2; Serine/threonine-protein kinase PAK 2   Q13177                         | YLS(1)FT(1)PPEK                               |
| 2.27                                                          | 0.01769  | ARHGEF2; Rho guanine nucleotide exchange factor   Q92974                     | SES(1)LESPRGER                                |
| 2.22                                                          | 0.00539  | EGFR; Epidermal growth factor receptor   P00533                              | MHLPS(1)PTDSNFYR                              |
| 2.09                                                          | 0.00689  | SLC20A2; Sodium-dependent phosphate transporter 2   Q08357                   | VQEAES(1)PVFK                                 |
| 2.09                                                          | 0.00354  | CCNL2; Cyclin-L2   Q96594                                                    | GSKP5(0.99)PLSVK                              |
| 2.06                                                          | 0.00080  | CCDC82; Coiled-coil domain-containing protein 82   F5H777                    | HLS(1)QEDNDLNK                                |
| 2.01                                                          | 0.00049  | CTTNBP2NL; CTTNBP2 N-terminal-like protein   Q9P2B4                          | VSSPLSPLS(1)PGIK                              |
| 1.96                                                          | 0.00209  | SH3BP4; SH3 domain-binding protein 4   Q9P0V3                                | DNPFRRS(1)K                                   |
| 1.88                                                          | 0.01072  | ZYX; Zyxin   Q15942                                                          | S(1)PGAGPLTLK                                 |
| 1.86                                                          | 0.00209  | IRF6; Interferon regulatory factor 6   O14896                                | LQIS(0.83)TPDIKDNIQAQLK                       |
| 1.77                                                          | 0.01594  | EGFR; Epidermal growth factor receptor   P00533                              | MHLPS(0.96)PTDS(0.99)NFYR                     |
| 1.66                                                          | 0.01298  | AHCTF1; Protein ELYS   Q8WYP5                                                | STPLASPS5(0.81)PGRS(0.91)PQR                  |
| 1.66                                                          | 0.00650  | PFKP; ATP-dependent 6-phosphofructokinase, platelet type   Q01813            | S(1)FAGNLNTYK                                 |
| 1.52                                                          | 0.00050  | SH2D4A; SH2 domain-containing protein 4A   Q9H788                            | TLS(0.99)SSAQEDIIR                            |
| 1.51                                                          | 0.00818  | PPP1R12A; Protein phosphatase 1 regulatory subunit 12A   O14974              | TGS(0.99)YGALAEITASK                          |
| 1.44                                                          | 0.00740  | UBAP1; Ubiquitin-associated protein 1   Q9NZ09                               | VLS(1)PPHK                                    |
| 1.43                                                          | 0.00091  | EGFR; Epidermal growth factor receptor   P00533                              | MHLPS(1)PTDSNFYR                              |
| 1.43                                                          | 0.00024  | PPP1R12A; Protein phosphatase 1 regulatory subunit 12A   O14974              | RLAS(0.99)TSDIEEK                             |

Supplementary Table S1

|      |          |                                                                                        |                                                |
|------|----------|----------------------------------------------------------------------------------------|------------------------------------------------|
| 1.42 | 0.00855  | NCKAP5L; Nck-associated protein 5-like  H7C1V4                                         | VDLEPV <sup>S</sup> (1)PR                      |
| 1.36 | 0.00348  | ABL2; Abelson tyrosine-protein kinase 2  P42684                                        | VPVLIS(0.86)PTLK                               |
| 1.26 | 7.47E-07 | AKAP11; A-kinase anchor protein 11  Q9UKA4                                             | S(0.99)FSEDFVQSVK                              |
| 1.25 | 0.01012  | PAC3IN3; Protein kinase C and casein kinase substrate in neurons protein 3  A0A0C4DGG1 | GGRS(0.99)PDEVTLTSIVPTR                        |
| 1.20 | 0.00206  | JUN; Transcription factor AP-1  P05412                                                 | LAS(1)PELER                                    |
| 1.11 | 0.00845  | TNS4; Tensin-4 Q8IZW8                                                                  | ASSPHGLGSPLVAS(1)PR                            |
| 1.11 | 0.00079  | ITGB4; Integrin beta-4  P16144                                                         | VLS(0.99)TSSTLTR                               |
| 1.09 | 4.57E-05 | CD97; CD97 antigen P48960                                                              | ALRAS(0.99)ESGI                                |
| 1.04 | 0.00424  | LARP1; La-related protein 1  Q6PKG0                                                    | S(0.99)LPPTVPES(1)PNYR                         |
| 1.04 | 0.00424  | LARP1; La-related protein 1  Q6PKG0                                                    | S(0.99)LPPTVPES(1)PNYR                         |
| 1.02 | 0.00620  | BCL9L; B-cell CLL/lymphoma 9-like protein  Q86UU0                                      | SVS(1)VDSGEQR                                  |
| 1.01 | 0.00817  | RPS27; 40S ribosomal protein S27  P42677                                               | DLLHPS(1)PEEEK                                 |
| 0.99 | 0.00668  | MAPK1; Mitogen-activated protein kinase 1  P28482                                      | VADPDHDTGFLT(0.98)EY(0.99)VATR                 |
| 0.98 | 0.00579  | CENPF; Centromere protein F  P49454                                                    | SVPVNNLPER <sup>S</sup> (0.87)PTDS(0.96)PREGLR |
| 0.97 | 0.00165  | MARCKS; Myristoylated alanine-rich C-kinase substrate (A0A087WZH7)  P29966             | GEPAAAAPEAGAS(1)PVEK                           |
| 0.92 | 0.00610  | FCHO2; F-BAR domain only protein 2  Q0JRZ9                                             | VSIGNITL <sup>S</sup> (0.98)PAISR              |
| 0.89 | 0.00603  | UBA1; Ubiquitin-like modifier-activating enzyme 1  P22314                              | ATLPS(0.99)PDKLPGFK                            |
| 0.88 | 0.00540  | DCAF5; DDB1- and CUL4-associated factor 5  Q96JK2                                      | AEEPPS(1)PPVPK                                 |
| 0.87 | 0.00701  | RBM34; RNA-binding protein 34  A2A2V2                                                  | S(1)VQEGENPDDGVR                               |
| 0.86 | 0.00583  | EIF4G1; Eukaryotic translation initiation factor 4 gamma 1  Q04637                     | EALPPV <sup>S</sup> (1)PLK                     |
| 0.82 | 0.00404  | TJAP1; Tight junction-associated protein 1  Q5JTD0                                     | AFVDR <sup>T</sup> (1)PPPAVAQR                 |
| 0.80 | 0.00079  | PKP3; Plakophilin-3  Q9Y446                                                            | ADYDTLS(0.99)LR                                |
| 0.79 | 0.00014  | NSUN2; tRNA (cytosine(34)-C(5))-methyltransferase  Q08J23                              | AGEPNS(1)PDAEEANS(0.99)PDVTAGCDPAGVHPPR        |
| 0.78 | 0.00218  | LIMA1; LIM domain and actin-binding protein 1  Q9UHB6                                  | LRS(1)PPEALVQGR                                |
| 0.75 | 0.00138  | RGPD5; RANBP2-like and GRIP domain-containing protein 5/6  Q99666                      | YVASVLGLTPS(0.96)PR                            |
| 0.74 | 0.00184  | STMN1; Stathmin  P16949                                                                | SKEVPEFPLS(1)PPK                               |
| 0.64 | 0.00018  | CCDC88A; Girdin  H0Y7K3                                                                | FYDPS(1)PPR                                    |

**Supplementary Table S1.** Significantly increased phosphopeptide relative abundance in A431/CCKBR cells treated with [<sup>177</sup>Lu]Lu-PP-F11N. MS2-based quantification shown as log<sub>2</sub> ratio,  $P < 0.05$ .

Supplementary Table S2

| LOG <sub>2</sub> (ratio)<br><sup>177</sup> Lu-PP-F11N<br>/CON | P-value  | LEADING PROTEIN   ACCESSION No.                                                   | SEQUENCE WINDOW<br>POSITION (PROBABILITY>0.5) |
|---------------------------------------------------------------|----------|-----------------------------------------------------------------------------------|-----------------------------------------------|
| -9.06                                                         | 0.00323  | HNRPU; Heterogeneous nuclear ribonucleoprotein U   Q00839                         | SS(0.75)SPVNVK                                |
| -8.51                                                         | 3.38E-05 | EGFR; Epidermal growth factor receptor   P00533                                   | ELVEPLT(1)PS(1)GEAPNQALLR                     |
| -8.09                                                         | 9.02E-05 | SRRM1; Serine/arginine repetitive matrix protein 1   Q81YB3                       | T(1)PS(1)PPPR                                 |
| -7.94                                                         | 4.33E-05 | SRRM1; Serine/arginine repetitive matrix protein 1   Q81YB3                       | T(1)PS(1)PPPR                                 |
| -6.40                                                         | 1.9E-05  | TCOF; Treacle Ribosome Biogenesis Factor   Q13428                                 | SLGNLQAKPTS(0.64)SPAK                         |
| -6.11                                                         | 7.02E-05 | H31; Histone H3.1   P68431                                                        | KS(1)APATGGVK                                 |
| -5.87                                                         | 8.81E-05 | SRRM2; Serine/arginine repetitive matrix protein 2   Q9UQ35                       | S(1)RT(1)PPSAPSQSR                            |
| -5.37                                                         | 0.00043  | MARK2; Serine/threonine-protein kinase MARK2   Q7KZ17                             | SVS(1)ANPK                                    |
| -5.29                                                         | 9.59E-06 | SRC8; Src substrate cortactin   Q14247                                            | TQT(0.84)PPVSPAPQPTTEERLPS(0.86)SPVYEDAASF    |
| -5.09                                                         | 0.01798  | SRRM2; Serine/arginine repetitive matrix protein 2   Q9UQ35                       | ELS(0.92)NSPLRENSFGS(0.99)PLEFR               |
| -4.95                                                         | 0.00011  | MDC1; Mediator of DNA damage checkpoint protein 1   Q14676                        | SQPPGEDS(0.99)DT(0.99)DVDDSDRRPPRPAEVHLER     |
| -4.91                                                         | 9.42E-06 | TAF12; Transcription initiation factor TFIIID subunit 12   Q16514                 | IPGTPGAGGRLS(0.99)PENNQVLTKK                  |
| -4.58                                                         | 0.00109  | DKC1; H/ACA ribonucleoprotein complex subunit 4   O60832                          | S(1)LPEDVAEIQAHEEFLIKPESK                     |
| -4.55                                                         | 0.00017  | TR150; Thyroid hormone receptor-associated protein 3   Q9Y2W1                     | GSFS(1)DTGLGDGK                               |
| -4.47                                                         | 0.00060  | SRRM2; Serine/arginine repetitive matrix protein 2   Q9UQ35                       | S(1)RT(1)PPSAPSQSR                            |
| -4.45                                                         | 0.00066  | NIBL1; Niban-like protein 1   Q96TA1                                              | QVVSVVQDEEVLPLFEASPE(0.97)PPASPDPGVTEIR       |
| -4.35                                                         | 0.00076  | F2Z2H1; RNA helicase Mov10l1   F2Z2H1                                             | MLS(1)LAAKLVAFWR                              |
| -4.31                                                         | 0.00025  | PGRMC2; Membrane-associated progesterone receptor component 2   U3KQM0            | LLKPGEEPSEY(0.99)DEEDTK                       |
| -4.28                                                         | 0.00489  | EGFR; Epidermal growth factor receptor   P00533                                   | YSSDPTGALTEDSIDTFLPVPEY(0.97)INQSVPK          |
| -3.99                                                         | 0.00248  | A0A087WZ13; Ribonucleoprotein PTB-binding 1   A0A087WZ13                          | AADVSVTHRPPLS(1)PK                            |
| -3.91                                                         | 0.00024  | NELFE; Negative elongation factor E   P18615                                      | SGAHS(0.67)ASPPR                              |
| -3.81                                                         | 0.00028  | FOXO3; Forkhead box protein O3   O43524                                           | AEAPAS(0.99)PAPLSPLEVELDPEFEPQSRPR            |
| -3.73                                                         | 0.00227  | SOS1; Son of sevenless homolog 1   G5E9C8;   G5E9C8                               | RRPESAPAES(0.81)PSK                           |
| -3.70                                                         | 0.00322  | POLR2A; DNA-directed RNA polymerase subunit   A0A0C4DGZ0                          | YSPTS(0.99)PTYSPSPK                           |
| -3.64                                                         | 0.00226  | SART3; Squamous cell carcinoma antigen recognized by T-cells 3   Q15020           | ATAAETS(0.99)ASEPEAESK                        |
| -3.62                                                         | 4.07E-05 | SF3B2; Splicing factor 3B subunit 2   Q13435                                      | SSLGQS(1)AS(1)ETEEDTVSVSKK                    |
| -3.61                                                         | 0.00041  | NOTCH4; Neurogenic locus notch homolog protein 4   Q99466                         | LEDPCPS(1)FCS(1)K                             |
| -3.53                                                         | 0.00011  | NOTCH4; Neurogenic locus notch homolog protein 4   Q99466                         | LEDPCPS(1)FCS(1)K                             |
| -3.50                                                         | 0.00038  | ZN800; Zinc finger protein 800   Q2TB10                                           | VKQDSESPKTS(0.71)PSAAGGQKQK                   |
| -3.49                                                         | 0.00188  | RPA1; Replication protein A 70 kDa DNA-binding subunit   P27694                   | GARVS(1)DFGGR                                 |
| -3.46                                                         | 0.00357  | CHAP1; Chromosome alignment-maintaining phosphoprotein 1   Q96JM3                 | KPGPPLS(1)PEIRS(1)PAGS(1)PELR                 |
| -3.43                                                         | 0.00308  | CHAP1; Chromosome alignment-maintaining phosphoprotein 1   Q96JM3                 | KPGPPLS(1)PEIRS(1)PAGS(1)PELR                 |
| -3.38                                                         | 8.86E-05 | CCDC6; Coiled-coil domain-containing protein 6   Q16204                           | SGGIVIS(0.99)FRLEELTNR                        |
| -3.33                                                         | 0.00137  | RAVER1; Ribonucleoprotein PTB-binding 1   A0A087WZ13                              | AADVSVTHRPPLS(0.99)PKS(1)GAEEVAGDAAER         |
| -3.31                                                         | 0.00087  | LAD1; Ladinin-1   O00515                                                          | RATASEQPLAQEPPASGGS(0.74)PATTK                |
| -3.30                                                         | 0.00036  | YAP1; Transcriptional coactivator YAP1   P46937                                   | NINPSTANS(0.99)PK                             |
| -3.22                                                         | 0.02100  | RRP1B; Ribosomal RNA processing protein 1 homolog B   Q14684                      | VAFDPEQKPLHGLVTKT(0.99)PTSSPASSPLVAK          |
| -3.19                                                         | 0.00138  | HDAC7; Histone deacetylase 7   Q8WUI4                                             | TVS(1)EPNLK                                   |
| -3.16                                                         | 0.00042  | MECP2; Methyl-CpG-binding protein 2   P51608                                      | AETSESGSAPAVEASAS(0.92)PK                     |
| -3.12                                                         | 0.00317  | SLK; STE20-like serine/threonine-protein kinase   Q9H2G2                          | SNS(0.99)EDKLNK                               |
| -3.11                                                         | 0.00408  | CHAP1; Chromosome alignment-maintaining phosphoprotein 1   Q96JM3                 | KPGPPLS(1)PEIRS(1)PAGS(1)PELR                 |
| -3.03                                                         | 0.00148  | ARHG5; Rho guanine nucleotide exchange factor 5   Q12774                          | TTPQQGASGPGRS(0.94)PVGQAR                     |
| -3.02                                                         | 0.00075  | RAD18; E3 ubiquitin-protein ligase RAD18   Q9N591                                 | NHLLQFALES(1)PAKS(0.98)PASSSSK                |
| -3.00                                                         | 0.00021  | RPA34; DNA-directed RNA polymerase I subunit RPA34   O15446                       | ILEGQQQLSGS(0.78)PLQPIPAS(1)PPPQIPPLRPR       |
| -2.96                                                         | 0.00131  | NUCKS; Nuclear ubiquitous casein and cyclin-dependent kinase substrate 1   Q9H1E3 | S(0.99)GKNSQEDSESDKDVK                        |
| -2.95                                                         | 0.00126  | CCKBR; Gastrin/cholecystokinin type B receptor   E9PIC8                           | CRPETGAVGEDSDGCY(1)VQLPR                      |

Supplementary Table S2

|        |          |                                                                    |                                             |
|--------|----------|--------------------------------------------------------------------|---------------------------------------------|
| -2.91  | 0.00112  | ZMYND8; Protein kinase C-binding protein 1   H7C4X9                | TPPSTTVGSHS(0.92)PPETPVLTR                  |
| -2.90  | 0.00023  | DCP1A; mRNA-decapping enzyme 1A   Q9NPI6                           | HAPTYTIPLS(0.84)PVL(0.94)PTLPAAEPTAQVPPSLPR |
| -2.85  | 0.00733  | CENPC; Centromere protein C   Q03188                               | ILATDVSSKNT(0.96)PDSK                       |
| -2.85  | 0.00059  | KMT2A; Histone-lysine N-methyltransferase 2A   Q03164              | ALSSAVQASPTS(0.81)PGGSPSS(0.55)PSSGQR       |
| -2.85  | 0.00429  | RPA34; DNA-directed RNA polymerase I subunit RPA34   O15446        | ILEGPQQSLSGS(0.96)PLQPIPASPPPQIPGLRPR       |
| -2.83  | 8.03E-06 | CGN; Cingulin   A6PVU7                                             | SHS(0.98)QASLAGPGVDPNSNR                    |
| -2.79  | 0.00578  | NUP50; Nuclear pore complex protein Nup50   Q9UKX7                 | KVDSSVGLSLSVPLTGFFS(0.98)PGNSSLFGK          |
| -2.79  | 0.00074  | NUP153; Nuclear pore complex protein Nup153   P49790               | CIACQAAKLS(1)PR                             |
| -2.76  | 0.00543  | PAXB1; PAX3- and PAX7-binding protein 1   Q9Y5B6                   | LVREENDAS(1)DDEDDEK                         |
| -2.72  | 0.00290  | RAD18; E3 ubiquitin-protein ligase RAD18   Q9NS91                  | NHLLQFALES(1)PAK                            |
| -2.72  | 0.00130  | RFC1; Replication factor C subunit 1   P35251                      | NKPLS(1)PIKLT(0.99)PTSVLDYFGTGSVQR          |
| -2.72  | 0.00243  | ABCD3; ATP-binding cassette sub-family D member 3   P28288         | S(1)GKPLQNNK                                |
| -2.65  | 0.00052  | CNTROB; Centrobilin   I3L465                                       | AQLYLPST(0.63)PPHEGLDGFQELSR                |
| -2.61  | 0.00012  | SSB; Lupus La protein   P05455                                     | S(0.92)PSKPLPEVTDEYKNDVK                    |
| -2.58  | 0.00199  | PPP1R13L; RelA-associated inhibitor   Q8WUF5                       | HGGPGPGGPEPELS(0.99)PITEGSEAR               |
| -2.57  | 0.00038  | RFC1; Replication factor C subunit 1   P35251                      | SSPAKESVS(0.97)PEDSEK                       |
| -2.57  | 0.00658  | DCP1A; mRNA-decapping enzyme 1A   Q9NPI6                           | HAPTYTIPLS(0.88)PVL(0.87)PTLPAAEPTAQVPPSLPR |
| -2.56  | 0.00054  | DNMT1; DNA (cytosine-5)-methyltransferase 1   P26358               | SDGEAKPEPS(1)PS(1)PR                        |
| -2.56  | 0.00053  | RFC1; Replication factor C subunit 1   P35251                      | NKPLS(1)PIK                                 |
| -2.52  | 0.00992  | MINK1; Misshapen-like kinase 1   Q8N4C8                            | NRVGVSSKPDSS(0.95)PVLSPGNK                  |
| -2.51  | 0.00185  | BCLF1; Bcl-2-associated transcription factor 1   Q9NYF8            | SGSS(0.86)PKWTHDK                           |
| -2.45  | 0.01394  | CNOT4; CCR4-NOT transcription complex subunit 4   O95628           | ELSVQDQPSLS(0.92)PTSLQNSSHTTTAK             |
| -2.45  | 0.00210  | KMT2A; Histone-lysine N-methyltransferase 2A   Q03164              | ALSSAVQASPTS(0.63)PGGSPSS(0.65)PSSGQR       |
| -2.44  | 0.00233  | RHAGAP29; Rho GTPase-activating protein 29   Q52LW3                | SLDSEIS(0.99)PGDFHR                         |
| -2.44  | 0.00620  | RS6; 40S ribosomal protein S6   P62753                             | RLS(1)S(1)LRAS(0.96)TSK                     |
| -2.43  | 0.00442  | PKP3; Plakophilin-3   Q9Y446                                       | LSS(0.99)GFDIDLPSAVK                        |
| -2.41  | 0.00600  | CIC; Protein capicua homolog   I3L2J0                              | ACTGLSGPGSGSKS(0.64)PPATR                   |
| -2.34  | 0.00334  | DYNC1L12; Cytoplasmic dynein 1 light intermediate chain 2   O43237 | KTGS(0.94)PGS(0.99)PGAGGVQSTAKK             |
| -2.29  | 0.00174  | KIF1B; Kinesin-like protein KIF1B   A0A087WWA3                     | AS(0.5)S(0.5)PCPEFEQFQIVPAVETPYLAR          |
| -2.27  | 0.00068  | CCDC9; Coiled-coil domain-containing protein 9   Q9Y3X0            | EGAASPAPETPQPTS(0.69)PETS PK                |
| -2.25  | 0.00275  | DTL; Denticleless protein   F5GZ90                                 | TPSSS(0.80)PPIT(0.99)PPASETK                |
| -2.25  | 0.01660  | RL1D1; Ribosomal L1 domain-containing protein 1   O76021           | KS(1)PAKS(0.99)PNPSTPR                      |
| -2.22  | 0.00771  | KIF1B; Kinesin-like protein KIF1B   A0A087WWA3                     | AS(0.5)S(0.5)PCPEFEQFQIVPAVETPYLAR          |
| -2.19  | 0.00429  | CDR2; Cerebellar degeneration-related protein 2   Q01850           | SSS(0.85)ETILSLAGSDIVK                      |
| -2.17  | 0.00033  | RHPN2; Rhophilin-2   Q8IUC4                                        | SAS(0.95)TLCLPSVGAARPQVK                    |
| -2.07  | 0.01372  | RBM34; RNA-binding protein   A2A2V2                                | SVQEGENPDDGVRGS(0.99)PPEDYR                 |
| -2.05  | 0.00085  | MAGI3; Membrane-associated guanylate kinase   Q5TCQ9               | IFYGEKQPEDDSSQAFISTQNGS(0.99)PR             |
| -2.043 | 9.9E-05  | SRCAP; Helicase SRCAP   A0A0A0MS59                                 | GAASTLVPGVSETSAS(0.59)PGSPSVR               |
| -1.93  | 0.01488  | CLDN4; Claudin-4   O14493                                          | SAAASNY(1)V                                 |
| -1.91  | 0.00112  | ATP13A1; Manganese-transporting ATPase 13A1   Q9HD20               | DS(0.98)PTLSNSGIR                           |
| -1.87  | 0.01166  | ZC3HC1; Nuclear-interacting partner of ALK   C9J0I9                | SWDSSS(0.75)PVDRPEPEAS(0.71)PTTR            |
| -1.86  | 0.0146   | PDLIM2; PDZ and LIM domain protein 2   Q96JY6                      | AGS(1)PFS(0.99)PPSSSLTGEEAISR               |
| -1.84  | 0.00059  | SETD2; Histone-lysine N-methyltransferase SETD2   H7BZ93           | LNDS(0.99)PTLK                              |
| -1.82  | 0.01259  | ZN318; Zinc finger protein 318   Q5VUA4                            | RSS(0.8)PPPPPGSSSRTPAR                      |
| -1.79  | 0.01615  | TJP1; Tight junction protein ZO-1   Q07157                         | LEEPTPAPSTYS(0.98)PQADSLR                   |
| -1.73  | 0.00989  | DNMT1; DNA (cytosine-5)-methyltransferase 1   P26358               | SDGEAKPEPS(1)PS(1)PR                        |
| -1.72  | 0.00104  | RPS6; 40S ribosomal protein S6   P62753                            | RLS(1)S(1)LRASTSK                           |

Supplementary Table S2

|       |          |                                                                                                                                           |                                                                           |
|-------|----------|-------------------------------------------------------------------------------------------------------------------------------------------|---------------------------------------------------------------------------|
| -1.72 | 0.01616  | MCM2; DNA replication licensing factor MCM2  P49736                                                                                       | AIPELD <sup>Y</sup> EAEGLALDDEDVEEL <sup>T</sup> (0.55)ASQREAAER          |
| -1.69 | 0.01214  | RPS6; 40S ribosomal protein S6 P62753                                                                                                     | LSSLRA <sup>ST</sup> SK <sup>S</sup> (0.96)ES <sup>S</sup> (0.69)QK       |
| -1.67 | 0.01230  | LRWD1; Leucine-rich repeat and WD repeat-containing protein 1  Q9UFC0                                                                     | ACAS <sup>S</sup> (0.9)PSAQVEG <sup>S</sup> (1)PVAGSDG <sup>S</sup> QPAVK |
| -1.65 | 0.01201  | RPL3; 60S ribosomal protein L3  P39023                                                                                                    | <sup>S</sup> (1)LLVQTK                                                    |
| -1.61 | 0.00736  | RSL1D1; Ribosomal L1 domain-containing protein 1  O76021                                                                                  | <sup>K</sup> S(1)PAK <sup>S</sup> (0.99)PNPSTPR                           |
| -1.59 | 0.00030  | UBE2O; (E3-independent) E2 ubiquitin-conjugating enzyme  Q9C0C9                                                                           | IMSC <sup>S</sup> (0.97)PDTQCSR                                           |
| -1.56 | 0.01326  | AFF4; AF4/FMR2 family member 4  Q9UHB7                                                                                                    | ELLSPL <sup>S</sup> (0.99)EPDDRPLIVK                                      |
| -1.51 | 0.00699  | PAX; Paxillin  P49023                                                                                                                     | DGGR <sup>S</sup> (0.79)SPGGQDEGGFMAQ <sup>G</sup> K                      |
| -1.47 | 0.01439  | BAG3; BAG family molecular chaperone regulator 3  O95817                                                                                  | SST(0.94)PLHS( <sup>PS</sup> (0.93)PIR                                    |
| -1.42 | 0.0092   | NPM1; Nucleophosmin  P06748                                                                                                               | <sup>S</sup> (1)APGGGSKVPQK                                               |
| -1.33 | 0.01066  | HNRNP1; Heterogeneous nuclear ribonucleoprotein H  P31943                                                                                 | EGRPSGEAFVELE <sup>S</sup> (1)EDEVK                                       |
| -1.30 | 0.00048  | DDX39A; ATP-dependent RNA helicase DDX39A  O00148                                                                                         | NRS(0.99)FSLK                                                             |
| -1.14 | 0.00396  | H14; Histone H1.4  P10412 , H15; Histone H1.5  P16401 , H13; Histone H1.3  P16402 , H12; Histone H1.2  P16403 , H11; Histone H1.1  Q02539 | GTGAS(0.8)GSFK                                                            |
| -1.11 | 0.00914  | FANCI; Fanconi anemia group I protein  Q9NV11                                                                                             | TIETS(0.95)PSLSR                                                          |
| -1.11 | 0.00589  | CALM1; Calmodulin  P62158                                                                                                                 | VFDKDGNGY(1)ISAAELR                                                       |
| -1.10 | 0.00953  | FGD1; FYVE, RhoGEF and PH domain-containing protein 1  P98174                                                                             | RGS(0.7)GSALGGPLDPQFVGPSTSLGAAPGHR                                        |
| -1.06 | 0.00434  | H15; Histone H1.5  P16401                                                                                                                 | SETAPAETAT(1)PAPVEK <sup>S</sup> (1)PAKK                                  |
| -1.06 | 0.00434  | H15; Histone H1.5  P16401                                                                                                                 | SETAPAETAT(1)PAPVEK <sup>S</sup> (1)PAKK                                  |
| -0.97 | 0.00071  | MYBBP1A; Myb-binding protein 1A  Q9BQG0                                                                                                   | SPS(1)LLQSGAK                                                             |
| -0.89 | 0.00044  | SKA3; Spindle and kinetochore-associated protein 3  Q8IX90                                                                                | NSVHEQEAIN <sup>S</sup> (1)DPELNCENCFQK                                   |
| -0.76 | 0.00137  | NUP93; Nuclear pore complex protein Nup93  Q8N1F7                                                                                         | GTS(0.98)PSSSRPQR                                                         |
| -0.74 | 0.002855 | ACOX1; Peroxisomal acyl-coenzyme A oxidase 1  Q15067                                                                                      | DSASFPELLTHILDG <sup>S</sup> (1)PEK                                       |
| -0.64 | 0.002831 | RANBP2; E3 SUMO-protein ligase RanBP2  P49792                                                                                             | NADSEIKH <sup>ST</sup> (0.97)PS(0.94)PTR                                  |

**Supplementary Table S2.** Significantly decreased phosphopeptide relative abundance in A431/CCKBR cells treated with [<sup>177</sup>Lu]Lu-PP-F11N. MS2-based quantification shown as log<sub>2</sub> ratio,  $P < 0.05$ .

Supplementary Table S3

| LOG <sub>2</sub> (ratio)<br>EBRT /<br>CONTROL | P-VALUE  | SYMBOL; NAME   UniProt                                                             | SEQUENCE WINDOW<br>POSITION (PROBABILITY>0.5) |
|-----------------------------------------------|----------|------------------------------------------------------------------------------------|-----------------------------------------------|
| 8.69                                          | 0.00010  | NUCKS1; Nuclear ubiquitous casein and cyclin-dependent kinase substrate 1   Q9H1E3 | IRS(0.5)S(0.5)PREAK                           |
| 6.74                                          | 0.00033  | EIF4G1; Eukaryotic translation initiation factor 4 gamma 1   E7EX73                | SSLS(0.99)RERGEK                              |
| 6.19                                          | 0.00053  | EIF4G1; Eukaryotic translation initiation factor 4 gamma 1   E7EX73                | RVVQR(0.69)SLSR                               |
| 6.15                                          | 0.00013  | RIF1; Telomere-associated protein RIF1   Q5UIP0                                    | RSEVVSTTES(1)QDK                              |
| 6.07                                          | 0.00043  | SRRM2; Serine/arginine repetitive matrix protein 2   Q9UQ35                        | S(1)KT(0.95)PSRQSHS(0.95)S(0.64)SP            |
| 5.88                                          | 7.13E-05 | SRRM2; Serine/arginine repetitive matrix protein 2   Q9UQ35                        | S(0.99)KT(0.99)PSRQSHSSSSPHPK                 |
| 5.77                                          | 4.83E-05 | ZNF638; Zinc finger protein 638   Q14966                                           | AVIVS(0.81)SPK                                |
| 5.74                                          | 0.00073  | RPL29; 60S ribosomal protein L29   P47914                                          | RTQAPTKAS(1)E                                 |
| 5.68                                          | 0.00039  | SRRM2; Serine/arginine repetitive matrix protein 2   Q9UQ35                        | PES(1)PKPAPAPGSHREIS(0.98)S(0.68)S            |
| 5.68                                          | 1.51E-05 | ZNF318; Zinc finger protein 318   Q5VUA4                                           | RAS(1)PS(1)PPRGR                              |
| 5.61                                          | 0.00021  | IWS1; Protein IWS1 homolog   Q96ST2                                                | KFHS(1)S(1)DS(1)EEEEHKK                       |
| 5.60                                          | 0.00046  | ZNF318; Zinc finger protein 318   Q5VUA4                                           | RAS(1)PS(1)PPRGR                              |
| 5.60                                          | 0.00051  | CRKL; Crk-like protein   P46109                                                    | LVRSS(0.73)PHGK                               |
| 5.41                                          | 0.00058  | SNIP1; Smad nuclear-interacting protein 1   Q8TAD8                                 | RTS(0.96)NERPGSGGQQGR                         |
| 5.40                                          | 0.00054  | CRKL; Crk-like protein   P46109                                                    | LVR(0.5)S(0.5)PHGK                            |
| 4.65                                          | 0.01448  | MDC1; Mediator of DNA damage checkpoint protein 1   Q14676                         | DTQRGEPGGS(1)QDQK                             |
| 4.64                                          | 0.00868  | DUT; Deoxyuridine 5'-triphosphate nucleotidohydrolase, mitochondrial   HOYNJ9      | PCS(1)EETPAIS(1)PSK                           |
| 4.55                                          | 0.00190  | MAP4; Microtubule-associated protein   E7EVA0                                      | RAS(0.99)PSKASAPASR                           |
| 4.51                                          | 0.00010  | RIF1; Telomere-associated protein RIF1   Q5UIP0                                    | NVS(1)QESLETK                                 |
| 4.51                                          | 0.00023  | POLE; DNA polymerase epsilon catalytic subunit A   FSH1D6                          | IHCGLQDS(1)QK                                 |
| 4.43                                          | 0.00235  | ZZZ3; ZZ-type zinc finger-containing protein 3   Q81VH5                            | RAAPTRGS(0.99)PTK                             |
| 4.35                                          | 7.60E-06 | ADAR; Double-stranded RNA-specific adenosine deaminase   P55265                    | TMLLS(0.87)RSPAQPK                            |
| 4.34                                          | 0.00026  | OXSR1; Serine/threonine-protein kinase OSR1   O95747                               | TAQALSSGSGS(0.88)QETK                         |
| 4.28                                          | 0.00601  | MCM4; DNA replication licensing factor MCM4   P33991                               | S(0.5)S(0.5)PAST(0.73)PSRRGSR                 |
| 4.28                                          | 0.00270  | PRPF38B; Pre-mRNA-splicing factor 38B   Q5VTL8                                     | RRS(1)QS(1)IEQES(1)QEK                        |
| 4.13                                          | 0.00139  | SP100; Nuclear autoantigen Sp-100   P23497                                         | DTTSKDDSLGS(1)QQTNEQCAQK                      |
| 4.13                                          | 0.00013  | RB1; Retinoblastoma-associated protein   P06400                                    | LQNNHTAADMY(0.72)LSPVRS(0.96)PK               |
| 4.06                                          | 0.00192  | SSRM1; Serine/arginine repetitive matrix protein 1   A9Z1X7                        | QRS(0.7)PVTK                                  |
| 4.04                                          | 0.00032  | DSG2; Desmoglein-2   Q14126                                                        | AAS(1)YTEEDENHTAK                             |
| 3.89                                          | 0.00023  | POLR2A; DNA-directed RNA polymerase II subunit RPB1   A0A0C4DGZ0   P24928          | LLVDS(1)NNPKIK                                |
| 3.85                                          | 0.01577  | SRRM2; Serine/arginine repetitive matrix protein 2   Q9UQ35                        | YSHSGS(0.88)SPDTK                             |
| 3.83                                          | 0.00087  | CHEK1; Non-specific serine/threonine protein kinase   J3KN87                       | VTS(1)GGVSESPGFSK                             |
| 3.82                                          | 0.00011  | ENSA; Alpha-endosulfine   O43768                                                   | S(1)QKQEEENPAEETGEEK                          |
| 3.79                                          | 0.00487  | RIF1; Telomere-associated protein RIF1   Q5UIP0                                    | NVS(0.99)QES(0.93)LETKEEKPEETPK               |
| 3.72                                          | 0.00384  | NFIC; Nuclear factor 1 C-type   P08651                                             | KTEMDS(1)PFNSPSPQD5PR                         |
| 3.64                                          | 0.00235  | RNF181; E3 ubiquitin-protein ligase RNF181   C9J1C6                                | TVIRGS(0.99)QAEK                              |
| 3.59                                          | 0.00075  | USP1; Ubiquitin carboxyl-terminal hydrolase 1   O94782                             | RALDFTDS(1)QENEEK                             |
| 3.54                                          | 0.00098  | TP53; Cellular tumor antigen p53   P04637                                          | MEEPQSDPSVEPPLS(0.98)QETFSDLWK                |
| 3.53                                          | 0.00055  | RNF168; E3 ubiquitin-protein ligase RNF168   Q81YW5                                | VAAERRAS(1)EEEEENK                            |
| 3.52                                          | 0.00228  | CHAF1A; Chromatin assembly factor 1 subunit A   Q13111                             | GLLSNHTGS(0.98)PR                             |
| 3.49                                          | 0.00671  | PATJ; InaD-like protein   Q8NI35                                                   | VPDS(1)PENELK                                 |
| 3.45                                          | 0.00288  | DYNC1L2; Cytoplasmic dynein 1 light intermediate chain 2   O43237                  | ASESPARGPS(0.6)GSPR                           |
| 3.40                                          | 0.00082  | UTP14A; U3 small nucleolar RNA-associated protein 14 homolog A   Q9BVJ6            | DSGS(1)QEVLSLR                                |
| 3.39                                          | 0.00285  | CEP152; Centrosomal protein of 152 kDa   O94986                                    | NVS(1)PEFVPCGEGGGFLHK                         |
| 3.35                                          | 0.01188  | RAD50; DNA repair protein RAD50   Q92878                                           | LFDVCGS(1)QDFESDLRLKEEIEK                     |
| 3.31                                          | 0.00058  | DDX47; Probable ATP-dependent RNA helicase DDX47   Q9H0S4                          | AAPEEHSPTAS(1)QPIVEEETK                       |
| 3.23                                          | 0.00036  | SLC4A1AP; Kanadaplin   A0A087X0M4                                                  | ETQTHENMS(1)QLS(1)EEEQNK                      |
| 3.21                                          | 0.00076  | NTHL1; Endonuclease III-like protein 1   P78549                                    | SRS(0.99)LGGGAGPR                             |
| 3.20                                          | 0.00101  | KHSRP; Far upstream element-binding protein 2   Q92945                             | VQS(1)PDSGGLPER                               |
| 3.17                                          | 0.00101  | TWISTNB; DNA-directed RNA polymerase I subunit RPA43   Q3B726                      | KKDPETYEVD(0.83)GTTK                          |
| 3.08                                          | 0.00075  | UIMC1; BRCA1-A complex subunit RAP80   Q96RL1                                      | MSEQAREVNS(1)QEEEEELLRK                       |
| 3.03                                          | 0.00187  | SIPA1L1; Signal-induced proliferation-associated 1-like protein   O43166           | HSA(1)PVPVFTSAR                               |
| 3.03                                          | 0.00623  | PHLDB1; Pleckstrin homology-like domain family B member 1   Q86UU1                 | SES(0.99)PRLSRK                               |
| 3.01                                          | 0.00442  | NCOR2; Nuclear receptor corepressor 2   C9J777                                     | SRS(0.99)PAPPADK                              |
| 2.93                                          | 0.00016  | HMG1; High mobility group protein HMG-I/HMG-Y   P17096                             | KLEEEEEGIS(1)QES(1)S(1)EEEEQ                  |

Supplementary Table S3

|      |          |                                                                                                   |                                  |
|------|----------|---------------------------------------------------------------------------------------------------|----------------------------------|
| 2.92 | 0.00019  | THRAP3; Thyroid hormone receptor-associated protein 3   Q9Y2W1                                    | SSS(0.98)KDS(0.76)RPSQAAGDNQGD E |
| 2.89 | 0.00044  | GIN52; DNA replication complex GINS protein PSF2   Q9Y248                                         | LRTNLQPLESTQS(1)QDF              |
| 2.85 | 0.01394  | THRAP3; Thyroid hormone receptor-associated protein 3   Q9Y2W1                                    | SSS(0.98)KDS(0.76)RPSQAAGDNQGD E |
| 2.83 | 9.40E-05 | MAP2K2; Dual specificity mitogen-activated protein kinase kinase 2   P36507                       | ELEAIFGRPVVDGEEGEPHS(0.8)PR      |
| 2.76 | 0.00082  | ARID1A; AT-rich interactive domain-containing protein 1A   O14497                                 | SNS(1)VGIQDAFNGSDSTFQK           |
| 2.71 | 0.00647  | ZSWIM8; Zinc finger SWIM domain-containing protein 8   H0YCW2                                     | GWGS(1)JGRPK                     |
| 2.67 | 0.00671  | HNRNPM; Heterogeneous nuclear ribonucleoprotein M   P52272                                        | MGS(1)GIER                       |
| 2.63 | 0.00074  | RCHY1; RING finger and CHY zinc finger domain-containing protein 1   Q96PM5                       | RIS(1)LDQK                       |
| 2.61 | 0.00658  | RADS1AP1; RAD51-associated protein 1   F5H1Y0                                                     | ELPTVTTNVQNS(1)QDK               |
| 2.57 | 0.00702  | TRIM28; Transcription intermediary factor 1-beta   Q13263                                         | S(1)GEGEVSLMR                    |
| 2.57 | 0.00963  | FAM83G; Protein FAM83G   A6ND36                                                                   | LLPDPGS(1)PR                     |
| 2.55 | 0.00124  | TCOF1; Treacle protein   Q13428                                                                   | GSLGS(1)QGAKEPEEELQK             |
| 2.54 | 0.01405  | MCM6; DNA replication licensing factor MCM6   Q14566                                              | EIESEID(1)EELINKK                |
| 2.53 | 0.01208  | PPP2R5A; Serine/threonine-protein phosphatase 2A 56 kDa regulatory subunit alpha isoform   Q15172 | RSQGS(0.91)S(0.92)QFRSQGSQAEHLPL |
| 2.50 | 0.00047  | C2CD5; C2 domain-containing protein 5   Q86Y57                                                    | SLQRAST(0.54)DNEELLQFPLELCSDSLPS |
| 2.48 | 0.01367  | CAST; Calpastatin   A0A0C4DGB5                                                                    | SESELIDELS(0.99)EDFDRSECK        |
| 2.47 | 0.00940  | PHAX; Phosphorylated adapter RNA export protein   Q9H814                                          | ETFASDTNEALASLDES(0.99)QEGHAEAK  |
| 2.47 | 0.00555  | RREB1; Ras-responsive element-binding protein 1   Q92766                                          | VTENGSPQGIKS(0.77)PSKPPGPNR      |
| 2.42 | 0.00076  | YBX1; Nuclease-sensitive element-binding protein 1   P67809                                       | NYQNYQNSE(0.97)GEK               |
| 2.41 | 0.00179  | SNW1; SNW domain-containing protein 1   Q13573                                                    | ALTSFLPAPTQLS(1)QDQLEAEK         |
| 2.38 | 0.00867  | CCP110; Centriolar coiled-coil protein of 110 kDa   Q43303                                        | LPSPEPMS(0.96)PK                 |
| 2.35 | 0.01272  | NDRG1; Protein NDRG1   Q92597                                                                     | SRS(0.59)HT(0.54)SEGALDITPNSGAA  |
| 2.34 | 0.00305  | YAP1; Transcriptional coactivator YAP1   P46937                                                   | AHS(0.91)SPASLQLGAVSPGLTPTGVVS   |
| 2.33 | 0.00089  | RALGPS2; Ras-specific guanine nucleotide-releasing factor RalGPS2   Q86X27                        | SVAAGALLPQT(0.91)PPSPR           |
| 2.32 | 0.00432  | CHEK2; Serine/threonine-protein kinase Chk2   O96017                                              | FAIGS(1)AREADPALNVETEILK         |
| 2.32 | 0.00082  | CHD4; Chromodomain-helicase-DNA-binding protein 4   F5GWX5                                        | IEENS(1)LKEEESIEGK               |
| 2.25 | 0.00847  | TP53BP1; Tumor suppressor p53-binding protein 1   Q12888                                          | LVPETEAS(1)EESLQFNLEK            |
| 2.23 | 0.00668  | MAPK14; Mitogen-activated protein kinase 14   Q16539                                              | S(1)QERPTFYR                     |
| 2.17 | 0.00801  | SYNCRIP; Heterogeneous nuclear ribonucleoprotein Q   O60506                                       | YGGPPPSVYSGQQPS(0.93)VGTEIFVG    |
| 1.98 | 0.01174  | CDC26; Anaphase-promoting complex subunit CDC26   Q8NHZ8                                          | QKEDVEVVGGS(1)DGEGAIGLSSDPK      |
| 1.94 | 0.00812  | MYPN; Myopalladin   A0A087WX60                                                                    | TPVDES(1)DDEIQHDEIPTGK           |
| 1.83 | 0.00705  | PABPN1; Polyadenylate-binding protein 2   Q86U42                                                  | APGPGPGSGAPGS(1)QEEEEEPGLVEGD    |
| 1.82 | 0.00629  | CBX3; Chromobox protein homolog 3   Q13185                                                        | LTWH(0.99)CPEDEAQ                |
| 1.76 | 0.01134  | HMG1; High mobility group protein HMG-I/HMG-Y   P17096                                            | KQPPVSPGTALVGS(1)QJK             |
| 1.74 | 0.01094  | TRIO; Triple functional domain protein   E7EPJ7                                                   | GGSFWSIPAS(0.90)PASRPGSFTFPGDS   |
| 1.68 | 0.00295  | UTP14A; U3 small nucleolar RNA-associated protein 14 homolog A   Q9BVJ6                           | RSELSQDAEPAGS(1)QETK             |
| 1.53 | 0.00778  | LRBA; Lipopolysaccharide-responsive and beige-like anchor protein   E9PEM5                        | ANLPTQLQDNL(0.93)PAASEAGEK       |
| 1.28 | 0.00377  | MCM2; DNA replication licensing factor MCM2   P49736                                              | EGLALDDEVEELTAS(0.99)QREAAER     |
| 0.97 | 0.00416  | BCLAF1; Bcl-2-associated transcription factor 1   Q9NYF8                                          | S(1)QEEPKDTEFHDPSEIDFNK          |
| 0.71 | 0.00061  | UPF1; Regulator of nonsense transcripts 1   Q92900                                                | SQIDVALS(0.99)QDSTYQGER          |

**Supplementary Table S3.** Significantly increased phosphopeptide relative abundance in A431/CCKBR cells after EBRT. MS2-based quantification shown as log<sub>2</sub> ratio,  $P < 0.05$ .

Supplementary Table S4

| LOG <sub>2</sub> (ratio)<br>EBRT /<br>CONTROL | P-VALUE  | SYMBOL; NAME  UniProt                                                    | SEQUENCE WINDOW<br>POSITION (PROBABILITY>0.5) |
|-----------------------------------------------|----------|--------------------------------------------------------------------------|-----------------------------------------------|
| -7.62                                         | 1.43E-05 | ARHGEF16; Rho guanine nucleotide exchange factor 16 Q5VV41               | AQRHSDS(0.96)SLEEK                            |
| -7.60                                         | 1.8E-06  | HIST3H3; Histone H3.1t  Q16695                                           | VARKS(1)JAPATGGVK                             |
| -6.77                                         | 0.00037  | NOLC1; Nucleolar and coiled-body phosphoprotein 1 Q14978                 | VAGGAAPSKPAS(1)AKK                            |
| -6.53                                         | 0.01849  | NPM1; Nucleophosmin P06748                                               | T(1)PKGSSVEDIK                                |
| -6.14                                         | 4.61E-05 | SRRM2; Serine/arginine repetitive matrix protein 2 Q9UQ35                | SST(0.98)PPGESYFGVSSLLQK                      |
| -6.01                                         | 1.46E-05 | NPM1; Nucleophosmin P06748                                               | T(1)PKT(1)PKGSSVEDIK                          |
| -5.98                                         | 4.31E-05 | EPRS; Bifunctional glutamate/proline--tRNA ligase P07814                 | EYIPGQPPLSQSSDS(0.84)SPTRNSEPAG               |
| -5.73                                         | 0.00030  | UBAP2L; Ubiquitin-associated protein 2-like Q14157                       | NPSDSAVHS(0.98)PFTK                           |
| -5.41                                         | 0.00027  | RSL1D1; Ribosomal L1 domain-containing protein 1 O76021                  | AAESET(1)PGKS(1)PEK                           |
| -5.32                                         | 0.01799  | NCL; Nucleolin P19338                                                    | ALVAT(1)PGKK                                  |
| -5.30                                         | 0.00032  | JUN; Transcription factor AP-1 P05412                                    | LAS(1)PELER                                   |
| -5.28                                         | 0.00050  | HIST1H1B; Histone H1.5 P16401                                            | SETAPATAT(1)PAPVEKS(1)PAK                     |
| -5.19                                         | 6.3E-05  | RPRD2; Regulation of nuclear pre-mRNA domain-containing protein 2 Q5VT52 | NTGVSPASRSPGPTGS(0.81)PSNLTSGL                |
| -5.14                                         | 1.03E-05 | MKI67; Proliferation marker protein Ki-67 P46013                         | RES(1)VNVLGK                                  |
| -5.06                                         | 0.01149  | RSRC2; Arginine/serine-rich coiled-coil protein 2 Q7L4I2                 | AAS(0.99)DTERDGLAPEK                          |
| -5.05                                         | 0.00012  | DIS3L2; DIS3-like exonuclease 2 Q8IYB7                                   | GVSAVAGPHDIGAS(1)PGDKK                        |
| -5.00                                         | 1.49E-05 | MKI67; Proliferation marker protein Ki-67 P46013                         | GRDVESVQT(0.99)PSK                            |
| -4.96                                         | 0.00020  | PRCC; Proline-rich protein PRCC Q92733                                   | KPSDGS(0.99)PDTKPSR                           |
| -4.82                                         | 0.00404  | MTA2; Metastasis-associated protein MTA2 O94776                          | GHLSRPEAQSL(0.99)PYTTSANR                     |
| -4.74                                         | 0.00054  | ESF1; ESF1 homolog Q9H501                                                | ALAEAS(1)EEELPS(1)DVDLNDPYFAEEV               |
| -4.72                                         | 2.4E-05  | CTPS1; CTP synthase 1  P17812                                            | DTYSDRSGS(0.88)SS(0.80)PDSEITELK              |
| -4.70                                         | 0.00012  | DTNB; Dystrobrevin E7EVB6                                                | LRLHEQASQPT(1)PEK                             |
| -4.57                                         | 0.00079  | LASP1; LIM and SH3 domain protein 1  Q14847                              | GFVVADT(1)PELQR                               |
| -4.53                                         | 0.00048  | SPAG1; Sperm-associated antigen 1  Q07617                                | GQTPEAGADKRS(1)PR                             |
| -4.53                                         | 0.00032  | A0A087WUU9;  A0A087WUU9                                                  | RHSAS(0.59)NLHALAHPAPSPGSCSPK                 |
| -4.49                                         | 0.00555  | TRA2B; Transformer-2 protein homolog beta P62995                         | S(1)RS(0.99)YSRDYR                            |
| -4.48                                         | 2.74E-05 | MINT; Msx2-interacting protein  Q96T58                                   | DLEPGEVPS(1)DS(1)DEDEGEHK                     |
| -4.47                                         | 0.00072  | PSIP1; PC4 and SFRS1-interacting protein O75475                          | S(1)LAEQRQHEEANK                              |
| -4.45                                         | 4.53E-05 | NOLC1; Nucleolar and coiled-body phosphoprotein 1  Q14978                | S(1)PAVKPAAAPK                                |
| -4.41                                         | 0.00040  | MKI67; Proliferation marker protein Ki-67 P46013                         | LDQPGNLPGS(1)NRR                              |
| -4.32                                         | 0.00064  | CBX5; Chromobox protein homolog 5 P45973                                 | S(1)NFSNSADDIK                                |
| -4.30                                         | 0.00140  | KPNA2; Importin subunit alpha-1 P52292                                   | STNENANT(1)PAAR                               |
| -4.29                                         | 0.00082  | TRA2A; Transformer-2 protein homolog alpha  Q13595                       | S(1)RS(1)HS(1)PMSNR                           |
| -4.27                                         | 0.00045  | GOLGA2; Golgin subfamily A member 2 A0A0C4DG55                           | LREYQQRNS(0.99)PGVPTGAK                       |
| -4.25                                         | 8.83E-05 | MINT; Msx2-interacting protein  Q96T58                                   | DLEPGEVPS(1)DS(1)DEDEGEHK                     |
| -4.22                                         | 0.00946  | NCL; Nucleolin P19338                                                    | VAVAT(1)PAKK                                  |
| -4.18                                         | 0.00144  | MKI67; Proliferation marker protein Ki-67 P46013                         | RRS(0.97)GASEANLIVAK                          |
| -4.13                                         | 0.00015  | RPA1; Replication protein A 70 kDa DNA-binding subunit  P27694           | GARVS(1)DFGGR                                 |
| -4.11                                         | 0.01401  | TOR1AIP1; Torsin-1A-interacting protein 1  A0A0A0MSK5                    | RGLRDS(1)HS(1)S(1)EEDEASSQDLSQTI              |
| -4.10                                         | 0.00029  | SMTN; Smoothelin P53814                                                  | VNS(1)PGTLAR                                  |
| -4.07                                         | 0.00325  | RFX7; DNA-binding protein RFX7 H0YLX2                                    | HHDTHFGLT(0.99)PV(1)PVQHQGAT                  |
| -4.04                                         | 1.98E-05 | PPP1R14B; Protein phosphatase 1 regulatory subunit 14B Q96C90            | VYFQS(1)PPGAAGEGGGADDEGPVRR                   |
| -4.04                                         | 0.00123  | DIDO1; Death-inducer obliterator 1  Q9BTC0                               | SILAKPS(0.70)SSPDR                            |
| -3.99                                         | 0.01379  | ATXN2L; Ataxin-2-like protein Q8WWM7                                     | TLSS(0.88)PSNRPSGETSVPPPAVGR                  |
| -3.99                                         | 0.00070  | TRA2A; Transformer-2 protein homolog alpha  Q13595                       | S(1)RS(1)HS(1)PMSNR                           |
| -3.98                                         | 0.00013  | VAPB; Vesicle-associated membrane protein-associated protein B/C  O95292 | IISTTASKE(0.98)PIVSK                          |
| -3.95                                         | 3.97E-05 | LAD1; Ladinin-1  O00515                                                  | RATASEQLAQEPPASGGS(0.98)PATTK                 |
| -3.94                                         | 0.00039  | CLCC1; Chloride channel CLIC-like protein 1 Q96S66                       | FQTGNKS(1)PEVLR                               |
| -3.94                                         | 4.79E-05 | MAZ; Myc-associated zinc finger protein  I3L2Z5                          | QVHS(0.86)TERPFK                              |
| -3.91                                         | 0.00326  | TRA2A; Transformer-2 protein homolog alpha  Q13595                       | S(1)RS(1)HS(1)PMSNR                           |
| -3.89                                         | 0.0002   | MDC1; Mediator of DNA damage checkpoint protein 1 Q14676                 | NRS(0.81)SGKT(1)PETLVPTAPK                    |
| -3.88                                         | 0.00193  | UTP18; U3 small nucleolar RNA-associated protein 18 homolog Q9Y5J1       | VQEHEDS(1)GDS(1)EVENEAK                       |
| -3.88                                         | 0.00240  | METAP2; Methionine aminopeptidase 2 P50579                               | QLERS(1)ALEDK                                 |
| -3.87                                         | 0.00494  | AATF; Protein AATF Q9NY61                                                | YLVDTGKPNAGS(0.99)EIS(1)S(1)EDDE              |
| -3.86                                         | 0.00021  | PTPN1; Tyrosine-protein phosphatase non-receptor type 1 P18031           | VVGSRLGAQAAS(1)PAK                            |



Supplementary Table S4

|       |          |                                                                               |                                    |
|-------|----------|-------------------------------------------------------------------------------|------------------------------------|
| -3.86 | 0.00113  | GPATCH2; G patch domain-containing protein 2  Q9NW75                          | KDHS(1)DS(1)DDQMLVAK               |
| -3.86 | 0.00069  | NEDD1; Protein NEDD1 Q8NHV4                                                   | LVTSGAESGLNLT(0.99)PSSNQTR         |
| -3.85 | 0.00205  | NUP98; Nuclear pore complex protein Nup98-Nup96  P52948                       | ALTT(0.95)PTHYKLT(0.87)PRPATR      |
| -3.85 | 0.00107  | TMPO; Lamina-associated polypeptide 2, isoforms beta/gamma  P42167            | HAS(1)PILPTEFSDIPIR                |
| -3.85 | 0.00632  | MCM4; DNA replication licensing factor MCM4  P33991                           | QRPDLGS(1)JAQK                     |
| -3.77 | 0.00216  | MKI67; Proliferation marker protein Ki-67 P46013                              | TFKES(1)PK                         |
| -3.76 | 0.00014  | DDX20; Probable ATP-dependent RNA helicase DDX20 Q9UHI6                       | S(0.99)YLEGSSDNQLK                 |
| -3.76 | 8.15E-05 | NUMA1; Nuclear mitotic apparatus protein 1 Q14980                             | LGS(1)PDYGNALLSLPGYRPTTR           |
| -3.71 | 0.00193  | GTSE1; G2 and S phase-expressed protein 1 Q9NYZ3                              | LLASS(0.92)PALPSSGAQAR             |
| -3.66 | 0.00015  | MAP7D1; MAP7 domain-containing protein 1 Q3KQU3                               | WSWAGALHHS(0.61)SPGHK              |
| -3.64 | 2.58E-05 | PDLIM1; PDZ and LIM domain protein 1 Q00151                                   | SAMPFTAS(0.99)PASSTTAR             |
| -3.61 | 0.00055  | NCKAP5L; Nck-associated protein 5-like H7C1V4                                 | VPTSAPSLGKPNKS(0.93)PHS(0.66)SPTK  |
| -3.60 | 0.01068  | MTDH; Protein LYRIC Q86UE4                                                    | WNSVS(0.99)PASAGK                  |
| -3.59 | 0.00123  | AATF; Protein AATF Q9NY61                                                     | DGTPNAGS(0.99)EES(1)S(1)EDDELVE    |
| -3.59 | 0.00125  | KLC3; Kinesin light chain 3 Q6P597                                            | TLASTQDLS(1)PH                     |
| -3.58 | 0.00812  | MYO9B; Unconventional myosin-Ixb M0R300                                       | KKPGDASSLPDAGLS(0.97)PGSQVDSK      |
| -3.58 | 0.00378  | DDX39A; ATP-dependent RNA helicase DDX39A  O00148                             | DLLDYDEEEEPQAPQES(0.59)TPAPPKK     |
| -3.54 | 1.66E-05 | MKI67; Proliferation marker protein Ki-67 P46013                              | ELFQT(1)PVCTDKPTTTEK               |
| -3.53 | 0.00221  | NUP98; Nuclear pore complex protein Nup98-Nup96  P52948                       | ALTT(0.89)PTHYKLT(0.98)PRPATR      |
| -3.51 | 0.01230  | MYBBP1A; Myb-binding protein 1A  Q9BQG0                                       | SPAPGAPTRS(0.87)PSTPAK             |
| -3.50 | 0.00016  | OSBPL11; Oxysterol-binding protein-related protein 11 Q9XB4                   | VSESEKLEGQATAVT(1)PNK              |
| -3.49 | 0.00079  | DDX39A; ATP-dependent RNA helicase DDX39A O00148                              | DLLDYDEEEEPQAPQEST(0.74)PAPPKK     |
| -3.49 | 0.00057  | RFX7; DNA-binding protein RFX7 H0YLX2                                         | HHDTFGRLT(0.99)PVS(1)PVQHQGAT      |
| -3.45 | 0.01152  | EP58; Epidermal growth factor receptor kinase substrate 8 Q12929              | QNS(0.93)SSSDSGGSIVR               |
| -3.34 | 0.00435  | NONO; Non-POU domain-containing octamer-binding protein Q15233                | FGQAATMEGIGAIGT(1)PPAFNR           |
| -3.32 | 0.00024  | AHNAK; Neuroblast differentiation-associated protein AHNAK Q09666             | LSGPS(1)LK                         |
| -3.28 | 0.00035  | NCAPD2; Condensin complex subunit 1 Q15021                                    | YQPLASTASDNDFVT(1)PEPR             |
| -3.25 | 0.00279  | ACIN1; Apoptotic chromatin condensation inducer in the nucleus E7EQT4         | S(1)KS(1)PS(0.98)PPRLTEDR          |
| -3.24 | 0.00155  | CLASP1; CLIP-associating protein  Q7Z460                                      | NSSNTSVGS(0.94)PSNTIGTRPSR         |
| -3.22 | 0.00225  | RTN4; Reticulon-4  Q9NQ63                                                     | RRGS(0.73)SGS(0.78)VDETLFALPAASEP  |
| -3.22 | 0.00400  | PPP1R10; Serine/threonine-protein phosphatase 1 regulatory subunit 10  Q96QC0 | RQSNVAAPGDA(1)PPAEK                |
| -3.20 | 0.00017  | TJP2; Tight junction protein ZO-2 Q9UDY2                                      | LISDFEDTDGEGGAYT(1)DNELDEPAEPL     |
| -3.16 | 0.00132  | GPATCH2; G patch domain-containing protein 2  Q9NW75                          | KDHS(1)DS(1)DDQMLVAK               |
| -3.15 | 0.01275  | EXOSC10; Exosome component 10  Q01780                                         | VSSQDFPNKQT(0.80)PSGKK             |
| -3.15 | 7.68E-06 | NCKAP5L; Nck-associated protein 5-like  H7C1V4                                | VPTSAPSLGKPNKS(0.93)PHS(0.66)SPTK  |
| -3.12 | 0.00130  | CHMP4B; Charged multivesicular body protein 4b  Q9H444                        | NLLEIS(0.99)GPETVPLPNVSPALPSKPA    |
| -3.10 | 0.00416  | DYNC1L1; Cytoplasmic dynein 1 light intermediate chain 1 Q9Y6G9               | SVSSNVASVS(0.96)PIPAGSK            |
| -3.10 | 0.00016  | DLGAP5; Disks large-associated protein 5 Q15398                               | NTASQNS(1)JLEEGETK                 |
| -3.08 | 0.00122  | HMG1; High mobility group protein HMG-1/HMG-Y  P17096                         | KQPPVS(1)PGTALVGSQK                |
| -3.07 | 0.00234  | MKI67; Proliferation marker protein Ki-67 P46013                              | DINTFLGT(1)PVQK                    |
| -3.06 | 0.00382  | MYBBP1A; Myb-binding protein 1A Q9BQG0                                        | PGAPTRSPS(0.54)T(0.54)PAKS(0.99)PK |
| -3.04 | 0.00088  | MAP7D1; MAP7 domain-containing protein 1 Q3KQU3                               | EAKES(0.99)PSAAGPEDK               |
| -3.02 | 0.00057  | PPP1R10; Serine/threonine-protein phosphatase 1 regulatory subunit 10 Q96QC0  | INVQEILTSIMGS(0.97)PNSHPSEELLK     |
| -2.99 | 0.01269  | TPX2; Targeting protein for Xklp2 Q9ULW0                                      | S(1)PAFALK                         |
| -2.95 | 0.00360  | SLC4A7; Anion exchange protein  C9JRP1                                        | KHS(1)DPHLLER                      |
| -2.93 | 0.00251  | ADRM1; Proteasomal ubiquitin receptor ADRM1  Q16186                           | SQSAAVT(0.99)PSSTTSSTR             |
| -2.91 | 0.00057  | MYBBP1A; Myb-binding protein 1A Q9BQG0                                        | S(1)PLSALAR                        |
| -2.88 | 0.00028  | PCM1; Pericentriolar material 1 protein Q15154                                | LRDQLNNS(0.96)SSSPQRSVDQR          |
| -2.86 | 0.01086  | DDX21; Nucleolar RNA helicase 2  Q9NR30                                       | DCNPSEASEENS(0.67)EIEQEIPVEQK      |
| -2.84 | 0.00298  | LMNB2; Lamin-B2 Q03252                                                        | AGGPAT(1)PLS(0.63)PTRLR            |
| -2.84 | 0.00579  | ANKRD2; Ankyrin repeat domain-containing protein 2 Q9GZV1                     | AEHNGLEGPNDS(0.91)GRETPQVPAQ       |
| -2.81 | 0.00492  | RAB8A; Ras-related protein Rab-8A P61006                                      | KLEGN5(1)PGGS(1)NQGVK              |
| -2.79 | 0.00950  | NIFK; MKI67 FHA domain-interacting nucleolar phosphoprotein Q9BYG3            | EIEIQTQT(0.99)PTHSR                |
| -2.78 | 0.00281  | C8orf33; UPF0488 protein C8orf33 Q9H7E9                                       | AALGHLAGAAAAAPGGT(0.98)PCASR       |
| -2.78 | 0.00243  | TP53BP1; TP53-binding protein 1 Q12888                                        | IDEDGENTQIEDTEPMS(0.99)PVLNSK      |
| -2.77 | 0.00011  | MCM4; DNA replication licensing factor MCM4 P33991                            | GLQVDLQ(1)DGAAAEDIVASEQLGQK        |
| -2.77 | 0.01547  | SYVN1; E3 ubiquitin-protein ligase synoviolin Q86TM6                          | LES(1)PVAH                         |
| -2.76 | 3.6E-08  | MKI67; Proliferation marker protein Ki-67 P46013                              | KPVGEVHSQFSTGHANS(0.98)PCTIIGK     |

Supplementary Table S4

|       |          |                                                                            |                                   |
|-------|----------|----------------------------------------------------------------------------|-----------------------------------|
| -2.76 | 0.00028  | SRRM2; Serine/arginine repetitive matrix protein 2   Q9UQ35                | DVNPGGKEET(0.93)PGQRPAVTETHQL     |
| -2.75 | 0.00171  | CHEK1; Serine/threonine-protein kinase Chk1   J3KN87                       | VTSGGVSE5(0.93)PSGFSK             |
| -2.74 | 0.00062  | NACC1; Nucleus accumbens-associated protein 1   Q96RE7                     | RLWDS(1)GQK                       |
| -2.73 | 0.00342  | SIPA1; Signal-induced proliferation-associated protein 1   F6RY50          | SVPSADSETPLTQDRPGS(0.84)PSGSEDK   |
| -2.73 | 0.01251  | ZNF644; Zinc finger protein 644   Q9H582                                   | HVVS(1)PEQIATSDK                  |
| -2.70 | 0.00770  | NOLC1; Nucleolar and coiled-body phosphoprotein 1   Q14978                 | LQT(1)PNT(1)FPK                   |
| -2.68 | 0.00051  | PALB2; Partner and localizer of BRCA2   Q86YC2                             | QFDSSGS(0.92)PAKPHTLQVSGR         |
| -2.66 | 0.00112  | ADAT1; tRNA-specific adenosine deaminase 1   Q9BUB4                        | IAPGS(1)AK                        |
| -2.60 | 0.00381  | ELAVL1; ELAV-like protein 1   Q15717                                       | NVALLSQLYHS(1)PAR                 |
| -2.60 | 0.00599  | PML; Protein PML   P29590                                                  | AVS(1)PPHLDGPPS(1)PRS(1)PVIGSEVFL |
| -2.58 | 0.00749  | KAT7; Histone acetyltransferase KAT7   O95251                              | NTADHDES(0.83)PPRT(0.89)PTGNAPSS  |
| -2.56 | 0.00658  | HNRNPA1; Heterogeneous nuclear ribonucleoprotein A1   P09651               | GGNFGGRSS(0.91)GPYGGGGYFAK        |
| -2.53 | 0.00076  | CCD86; Coiled-coil domain-containing protein 86   Q9H6F5                   | RALVEFESNPEET(0.58)REPGSPSPVQR    |
| -2.52 | 3.28E-05 | JPT1; Jupiter microtubule associated homolog 1   Q9UK76                    | MASNIFG(1)PEENQASWAK              |
| -2.51 | 0.00098  | STAU2; Double-stranded RNA-binding protein Staufien homolog 2   A0A0A0MTD1 | GSSPT(0.98)PPCS(1)PVQPSK          |
| -2.46 | 0.00083  | ARHGEF7; Rho guanine nucleotide exchange factor 7   B1ALK7                 | SGTLKS(1)PPK                      |
| -2.45 | 0.00225  | MKI67; Proliferation marker protein Ki-67   P46013                         | LDLLGNLPGS(1)K                    |
| -2.43 | 0.00950  | JPT2; Jupiter microtubule associated homolog 2   Q9H910                    | AMKPPGGESNLFGS(0.99)PEEATPSSRP    |
| -2.42 | 0.00078  | DEK; Protein DEK   P35659                                                  | S(1)LIVEGKREK                     |
| -2.41 | 0.00914  | TJAP1; Tight junction-associated protein 1   Q5JTD0                        | HLHSGQEAS(0.97)PGPAPSLAPGAVVP     |
| -2.39 | 0.00252  | NOLC1; Nucleolar and coiled-body phosphoprotein 1   Q14978                 | LQT(1)PNT(1)FPK                   |
| -2.39 | 0.00871  | TCOF; Treacle protein   Q13428                                             | VGDVT(1)PQVK                      |
| -2.38 | 0.00698  | PPP1R2; Protein phosphatase inhibitor 2   P41236                           | GDDEDACS(0.94)DTEATEAMAPDILARK    |
| -2.38 | 0.00860  | CDC42EP1; Cdc42 effector protein 1   Q00587                                | ASWES(1)LDEEWRAQAGSR              |
| -2.37 | 0.00476  | NUP153; Nuclear pore complex protein Nup153   P49790                       | FSS(1)PIVK                        |
| -2.36 | 0.00116  | MK67; MKI67 FHA domain-interacting nucleolar phosphoprotein   Q9BYG3       | TVDS(0.99)QGPT(1)PVCT(0.97)PTFLER |
| -2.34 | 0.00951  | LMNB2; Lamin-B2   Q03252                                                   | AGGPATPLS(0.98)PTRLR              |
| -2.33 | 0.00715  | SFPQ; Splicing factor, proline- and glutamine-rich   P23246                | GMGPGT(1)PAGYGR                   |
| -2.33 | 0.01197  | RPRD2; Regulation of nuclear pre-mRNA domain-containing protein 2   Q5VT52 | QYPDS(0.99)PHVPVHR                |
| -2.32 | 0.00039  | NAP1L4; Nucleosome assembly protein 1-like 4   Q99733                      | LDNVPHT(0.93)PSSYIETLPK           |
| -2.29 | 9.88E-05 | MEPCE; 75K snRNA methylphosphate capping enzyme   Q7L2J0                   | GGGPQAQSHGEARLS(1)DPPGR           |
| -2.28 | 0.00214  | KAT7; Histone acetyltransferase KAT7   O95251                              | NTADHDES(0.80)PPRT(0.97)PTGNAPSS  |
| -2.27 | 0.00503  | HMMR; Hyaluronan mediated motility receptor   O75330                       | RFNDPSGCAPS(0.99)PGAYDVK          |
| -2.26 | 0.00034  | HMG1; High mobility group protein HMG-1/HMG-Y   P17096                     | EPSEVPT(1)PK                      |
| -2.25 | 0.00180  | CBX8; Chromobox protein homolog 8   Q9HC52                                 | RQDSDLVQCQVTS(0.76)PSSAEATGK      |
| -2.24 | 0.00384  | TOR1AIP1; Torsin-1A-interacting protein 1   A0A0A0MSK5                     | VNFSEEGT(1)EEDDQDSSHSVTTVK        |
| -2.23 | 0.01114  | HUWE1; E3 ubiquitin-protein ligase HUWE1   Q72627                          | AGSST(0.82)PGDAPPAAVEVQGR         |
| -2.22 | 0.00550  | TNS3; Tensin-3   Q68C22                                                    | LRKLS(1)LGQYNDAGGQLPFSK           |
| -2.21 | 0.01007  | EAPP; E2F-associated phosphoprotein   G3V2W9                               | VATAPTRYDDIYFDS(1)DS(1)EDEDRAV    |
| -2.19 | 0.00763  | MAP4; Microtubule-associated protein   E7EVA0                              | DGVLTLANNVT(1)PAK                 |
| -2.15 | 0.00402  | WNK2; Serine/threonine-protein kinase WNK2   F8W9F9                        | RPEQQDVSS(0.94)PAK                |
| -2.15 | 0.00165  | NAP1L4; Nucleosome assembly protein 1-like 4   Q99733                      | ADHS(1)FS(1)DGVPSDSVEAAK          |
| -2.15 | 0.00197  | TMPO; Lamina-associated polypeptide 2, isoform alpha   P42166              | SHISDQS(1)PLSSK                   |
| -2.14 | 0.00128  | APC; Adenomatous polyposis coli protein   P25054                           | SGRS(0.82)PTGNTPPVIDSVSEK         |
| -2.10 | 0.00299  | CDCA3; Cell division cycle-associated protein 3   Q99618                   | LGRS(0.99)PLTLQDDNS(0.99)PGTLTLR  |
| -2.10 | 0.00096  | PARG; Poly(ADP-ribose) glycohydrolase   Q86W56                             | WGAATS(0.95)PAASDAR               |
| -2.07 | 0.00245  | CDCA3; Cell division cycle-associated protein 3   Q99618                   | LGRS(0.99)PLTLQDDNS(0.99)PGTLTLR  |
| -2.07 | 0.00604  | MKI67; Proliferation marker protein Ki-67   P46013                         | ELFQT(1)PDHTEESTDDK               |
| -2.07 | 0.00895  | PPP1R18; Phostensin   A0A0G2JHC2                                           | DWRQS(1)PGEVGDR                   |
| -2.06 | 0.01277  | MDC1; Mediator of DNA damage checkpoint protein 1   Q14676                 | TVPIAPELPPSTTEQPV(0.71)PEPTSR     |
| -2.05 | 0.00319  | MRTFB; Myocardin-related transcription factor B   Q9ULH7                   | SGEISLPIKEEPS(1)PISK              |
| -2.04 | 0.00844  | A0A087WUL7;   A0A087WUL7                                                   | DAAALQTSKPSAEDAEGQS(1)PLSQK       |
| -2.04 | 0.00069  | ANLN; Anillin   Q9NQW6                                                     | SCEGQNPPELLPKT(1)PIS(1)PLK        |
| -2.01 | 0.00014  | RRM2; Ribonucleoside-diphosphate reductase subunit M2   P31350             | ENT(1)PPALSGTR                    |
| -2.01 | 0.01083  | DIDO1; Death-inducer obliterator 1   Q9BTC0                                | STT(0.71)PPGS(0.99)PPPPPLPEPPVLK  |
| -2.01 | 0.00952  | MKI67; Proliferation marker protein Ki-67   P46013                         | ELFQT(1)PGHTEELVAAGK              |
| -2.00 | 0.00044  | PHF14; PHD finger protein 14   O94880                                      | SNEDS(1)LILEK                     |
| -1.99 | 0.00416  | PDLIM5; PDZ and LIM domain protein 5   Q96HC4                              | EVVKVPVITS(0.99)PAVSK             |

Supplementary Table S4

|       |          |                                                                                                                                                                                                                                                                                                                |                                      |
|-------|----------|----------------------------------------------------------------------------------------------------------------------------------------------------------------------------------------------------------------------------------------------------------------------------------------------------------------|--------------------------------------|
| -1.95 | 0.00180  | RBM15B; Putative RNA-binding protein 15B Q8NDT2                                                                                                                                                                                                                                                                | TTHS(0.99)PYEER                      |
| -1.95 | 0.00103  | RACGAP1; Rac GTPase-activating protein 1 Q9H0H5                                                                                                                                                                                                                                                                | VSLGPPVTT(0.80)PEHQLLK               |
| -1.95 | 0.00469  | PBK; Lymphokine-activated killer T-cell-originated protein kinase Q96K85                                                                                                                                                                                                                                       | GLSHS(1)PWAVK                        |
| -1.95 | 9.87E-06 | RICTROR; Rapamycin-insensitive companion of mTOR Q6R327                                                                                                                                                                                                                                                        | HIEDTGS(0.90)TPS(0.98)IGENDLK        |
| -1.94 | 0.00252  | MDC1; Mediator of DNA damage checkpoint protein 1 Q14676                                                                                                                                                                                                                                                       | DLEPFTPTDQSVT(0.93)PEAIAQGGQSK       |
| -1.92 | 0.00451  | NECAP2; Adaptin ear-binding coat-associated protein 2 Q9NVZ3                                                                                                                                                                                                                                                   | VRPAS(0.74)TGGLSLPPPPGGK             |
| -1.90 | 0.00869  | NUP107; Nuclear pore complex protein Nup107 P57740                                                                                                                                                                                                                                                             | RVLLQASQDENFGNTT(0.78)PRNQVIPR       |
| -1.90 | 0.00025  | TNKS1BP1; 182 kDa tankyrase-1-binding protein Q9C0C2                                                                                                                                                                                                                                                           | VNLFPGLS(0.87)PSALK                  |
| -1.88 | 0.00762  | PDLIM1; PDZ and LIM domain protein 1 O00151                                                                                                                                                                                                                                                                    | VWS(1)PLVTEEGK                       |
| -1.87 | 0.00786  | TP53BP1; TP53-binding protein 1 Q12888                                                                                                                                                                                                                                                                         | TGTRETAVPPLGIEDIS(1)PNLS(1)PDDK      |
| -1.87 | 0.00968  | KI67; Proliferation marker protein Ki-67 P46013                                                                                                                                                                                                                                                                | ELFQT(0.99)PGTDKPTTDEK               |
| -1.87 | 0.00798  | CASC3; Protein CASC3 O15234                                                                                                                                                                                                                                                                                    | LEQTSVRDPS(0.97)PEADAPVLGS(1)PEK     |
| -1.86 | 0.00088  | ANKHD1; Ankyrin repeat and KH domain-containing protein 1 Q8IWZ3                                                                                                                                                                                                                                               | TVSLPLS(0.99)PNIK                    |
| -1.84 | 0.00685  | ANKZF1; Ankyrin repeat and zinc finger domain-containing protein 1 Q9H8Y5                                                                                                                                                                                                                                      | LAALQAGPTS(0.92)PIPDASIVNTRR         |
| -1.83 | 0.00040  | LAMTOR1; Ragulator complex protein LAMTOR1 Q6IAA8                                                                                                                                                                                                                                                              | LLDPS(0.97)PPTK                      |
| -1.83 | 0.00195  | RBMXL1; RNA binding motif protein, X-linked-like-1 Q96E39                                                                                                                                                                                                                                                      | GLPPS(1)VER                          |
| -1.82 | 0.00145  | PCBP1; Poly(rC)-binding protein 1 Q15365                                                                                                                                                                                                                                                                       | DLEGPLDAYSIQGQHTIS(0.88)PLDLAK       |
| -1.82 | 0.00394  | CTTN; Src substrate cortactin Q14247                                                                                                                                                                                                                                                                           | DY(1)SSGFGGK                         |
| -1.81 | 0.00255  | MARK2; Serine/threonine-protein kinase MARK2 Q7KZ17                                                                                                                                                                                                                                                            | EGDTITLKRPSADLNTSSAPS(0.89)PSHK      |
| -1.80 | 0.00057  | ATF7IP; Activating transcription factor 7-interacting protein 1 Q6VMQ6                                                                                                                                                                                                                                         | EAFVLS(1)DEEDISGEK                   |
| -1.78 | 0.00835  | KPNA3; Importin subunit alpha-4 O00505                                                                                                                                                                                                                                                                         | KRNVPQES(1)LEDS(1)DVDADFK            |
| -1.76 | 0.00554  | NCBP3; Nuclear cap-binding protein subunit 3 Q53F19                                                                                                                                                                                                                                                            | MIST(0.98)PS(0.99)PKK                |
| -1.76 | 0.00683  | HDLBP; High density lipoprotein binding protein (Vigilin), isoform CRA_a A0A024R4E5                                                                                                                                                                                                                            | DCDPS(1)PRRCDIHSGR                   |
| -1.72 | 0.00529  | ZYX; Zyxin Q15942                                                                                                                                                                                                                                                                                              | FTPVASKFS(1)PGAPGSGSQPNQK            |
| -1.71 | 0.00092  | MYBBP1A; Myb-binding protein 1A Q9BQG0                                                                                                                                                                                                                                                                         | LSLVIRS(0.81)PSLLQSGAK               |
| -1.70 | 0.00136  | CIC; Protein capicua homolog I3L2J0                                                                                                                                                                                                                                                                            | SRQPS(0.77)PLLLPPAAGLTSDPGPSVR       |
| -1.70 | 0.00039  | CASP8AP2; CASP8-associated protein 2 A0A087WTW5                                                                                                                                                                                                                                                                | VLRNES(1)PPQVPVYNNSHK                |
| -1.69 | 0.00945  | RRBP1; Ribosome-binding protein 1 A0A0A0MRV0                                                                                                                                                                                                                                                                   | NTDVAQS(1)PEAPKQEAPAKK               |
| -1.68 | 0.00238  | TOP2A; DNA topoisomerase 2-alpha P11388                                                                                                                                                                                                                                                                        | MEVS(1)PLQPVNENMQVNK                 |
| -1.66 | 0.00950  | RRP1B; Ribosomal RNA processing protein 1 homolog B Q14684                                                                                                                                                                                                                                                     | PLHGVLT(0.88)PT(0.81)SSPASSPLVAK     |
| -1.61 | 0.00066  | SHC1; SHC-transforming protein 1 P29353                                                                                                                                                                                                                                                                        | ELFDDPSY(0.74)VNVQNLDK               |
| -1.61 | 0.01055  | MAP7; Ensconsin Q14244                                                                                                                                                                                                                                                                                         | LFVT(0.99)PPEGSSR                    |
| -1.59 | 0.00645  | FAM83H; Protein FAM83H Q6ZRV2                                                                                                                                                                                                                                                                                  | GS(0.99)PTSAYPERK                    |
| -1.58 | 0.00768  | BCLFA1; Bcl-2-associated transcription factor 1 Q9NYF8                                                                                                                                                                                                                                                         | DTFEHPSES(1)IDEFNK                   |
| -1.58 | 0.00069  | RGPD3; RanBP2-like and GRIP domain-containing protein 3 A6NKT7 . RGPD1; RanBP2-like and GRIP domain-containing protein POJDJO . RANBP2; E3 SUMO-protein ligase RanBP2 P49792 . RGPD4; RanBP2-like and GRIP domain-containing protein 4 Q723J3 . RGPDS; RanBP2-like and GRIP domain-containing protein 4 Q99666 | ITPHVS(0.63)RS(0.71)S(0.71)T(0.69)PR |
| -1.57 | 0.00024  | CAVIN1; Caveolae-associated protein 1 Q6NZ12                                                                                                                                                                                                                                                                   | SFT(1)PDHVYYAR                       |
| -1.56 | 0.00373  | CDC42EP1; Cdc42 effector protein 1 Q00587                                                                                                                                                                                                                                                                      | QARAS(1)WES(0.99)LDEEWRAQAGSR        |
| -1.56 | 0.00010  | ARFGAP1; ADP-ribosylation factor GTPase-activating protein 1 Q8N6T3                                                                                                                                                                                                                                            | LAEGREWSLESSPAQNW(0.98)PPQPR         |
| -1.51 | 0.00591  | DCP2; m7GpppN-mRNA hydrolase H0Y9T5                                                                                                                                                                                                                                                                            | FRHSQQLFPDGS(1)PGDQWVK               |
| -1.50 | 0.00530  | SCRIB; Protein scribble homolog A0A0G2JNZ2                                                                                                                                                                                                                                                                     | ALS(1)PAELR                          |
| -1.46 | 0.00639  | PGAM1; Phosphoglycerate mutase 1 P18669                                                                                                                                                                                                                                                                        | S(0.99)YDVPPPEPDPHPFYSNISK           |
| -1.42 | 0.00864  | TMCC3; Transmembrane and coiled-coil domain protein 3 Q9ULS5                                                                                                                                                                                                                                                   | RGGS(0.68)DTNLNFDVDPDGLDFHK          |
| -1.41 | 0.00430  | UCHL3; Ubiquitin carboxyl-terminal hydrolase isozyme L3 P15374                                                                                                                                                                                                                                                 | FLEESVMS(0.99)PEERAR                 |
| -1.37 | 0.00749  | MAPK1IP1L; MAPK-interacting and spindle-stabilizing protein-like Q8NDCO                                                                                                                                                                                                                                        | SDEFSLADALPEHS(1)PAK                 |
| -1.36 | 0.00279  | NUCKS1; Nuclear ubiquitous casein and cyclin-dependent kinase substrate 1 Q9H1E3                                                                                                                                                                                                                               | ATVT(1)PS(1)PVK                      |
| -1.36 | 0.00791  | TOP2A; DNA topoisomerase 2-alpha P11388                                                                                                                                                                                                                                                                        | TQMAEVLPS(1)PR                       |
| -1.36 | 0.00422  | JPT2; Jupiter microtubule associated homolog 2 Q9H910                                                                                                                                                                                                                                                          | TSDFGS(1)PVTATSR                     |
| -1.33 | 0.00152  | ZC3HAV1; Zinc finger CCCH-type antiviral protein 1 C9J6P4                                                                                                                                                                                                                                                      | GESTAPAQVSTLP(0.91)PAALSSSNR         |
| -1.27 | 0.00634  | MDC1; Mediator of DNA damage checkpoint protein 1 Q14676                                                                                                                                                                                                                                                       | EDS(1)DT(1)DVDDSRPPGRPAEVHLER        |
| -1.24 | 0.00118  | RAB1A; Ras-related protein Rab-1A P62820                                                                                                                                                                                                                                                                       | IQST(0.81)PVK                        |
| -1.23 | 0.00361  | ANLN; Anillin Q9NQW6                                                                                                                                                                                                                                                                                           | GNWS(1)AEK                           |
| -1.22 | 0.00737  | NFIA; Nuclear factor 1 B1AKN5                                                                                                                                                                                                                                                                                  | SGFSSPS(0.97)PSQTSSLGTAFTQHHR        |
| -1.19 | 0.00036  | DBNL; Drebrin-like protein Q9UJU6                                                                                                                                                                                                                                                                              | YQEQGGEAS(0.99)PQRTWEQQEVVSR         |
| -1.17 | 0.00672  | RAVER1; Ribonucleoprotein PTB-binding 1 A0A087WZ13                                                                                                                                                                                                                                                             | AIGS(0.84)PLGSGEGLLGLS(1)PGPNGHSHLLK |
| -1.13 | 0.00350  | HAUS6; HAUS augmin-like complex subunit 6 Q7Z4H7                                                                                                                                                                                                                                                               | NQIPRT(1)PENLITEIR                   |
| -1.08 | 0.00061  | TPR; Nucleoprotein TPR P12270                                                                                                                                                                                                                                                                                  | EGVQGPLNVS(0.96)LSEEGK               |
| -1.04 | 0.00399  | AHNAK; Neuroblast differentiation-associated protein AHNAK Q09666                                                                                                                                                                                                                                              | SRVDIETPNLEGLTGPRLGS(0.99)PSGK       |

## Supplementary Table S4

|        |         |                                                                        |                                                          |
|--------|---------|------------------------------------------------------------------------|----------------------------------------------------------|
| -1.03  | 0.00182 | SRRM2; Serine/arginine repetitive matrix protein 2   Q9UQ35            | QGSIT <sup>S</sup> (0.7)PQANEQSV <sup>T</sup> (0.94)PQRR |
| -1.02  | 0.00250 | DKC1; H/ACA ribonucleoprotein complex subunit DKC1   O60832            | <sup>S</sup> (1)LPPEEDVAEIQHAEFLIKPESK                   |
| -1.01  | 0.00496 | CHD3; Chromodomain-helicase-DNA-binding protein 3   H7C3H7             | GRPPAQALGPAAS(1)PPPS(1)PPLGPSLG                          |
| -1.01  | 0.00048 | CRYBG1; Beta/gamma crystallin domain-containing protein 1   A0A0J9YWL0 | DTCVQS(1)PISSFPCTDLK                                     |
| -0.817 | 0.00246 | GATAD2A; Transcriptional repressor p66-alpha   Q86YP4                  | TSAQANSTPTSVASVVTSAES(0.99)PASR                          |
| -0.70  | 0.00021 | RAD18; E3 ubiquitin-protein ligase RAD18   Q9NS91                      | NHLLQFALES(1)PAKS(0.99)PASSSSK                           |

**Supplementary Table S4.** Significantly decreased phosphopeptide relative abundance level in A431/CCKBR cells after EBRT. MS2-based quantification shown as log<sub>2</sub> ratio,  $P < 0.05$ .

| LOG <sub>2</sub> RATIO:<br><sup>177</sup> Lu-PP-F11N/CON | P-value | UniProt    | PROTEIN                                                        |
|----------------------------------------------------------|---------|------------|----------------------------------------------------------------|
| 5.27                                                     | 2.6E-06 | A0A0C4DH73 | IGKV1-12; Protein IGKV1-12                                     |
| 4.44                                                     | 2.5E-05 | Q9BQ67     | GRWD1; Glutamate-rich WD repeat-containing protein 1           |
| 3.37                                                     | 0.0001  | P52594     | AGFG1; Arf-GAP domain and FG repeat-containing protein 1       |
| 2.47                                                     | 3.2E-05 | O43815     | STRN; Striatin                                                 |
| 2.41                                                     | 2.6E-05 | Q7Z4H3     | HDDC2; HD domain-containing protein 2                          |
| 2.25                                                     | 0.001   | Q13751     | LAMB3; Laminin subunit beta-3                                  |
| 2.16                                                     | 9.5E-05 | P53539     | FOSB; Protein fosB                                             |
| 1.82                                                     | 0.0001  | P53814     | SMTN; Smoothelin                                               |
| 1.65                                                     | 6.3E-05 | H3BRB3     | KIF22; Kinesin-like protein                                    |
| 1.64                                                     | 0.0005  | Q15750     | TAB1; TGF-beta-activated kinase 1 and MAP3K7-binding protein 1 |
| 1.62                                                     | 0.0002  | O96005     | CLPT1; Cleft lip and palate transmembrane protein              |
| 1.46                                                     | 0.0001  | I3VM54     | KDM2A; Lysine-specific demethylase 2A                          |
| 1.09                                                     | 0.0010  | Q7Z4H7     | HAUS6; HAUS augmin-like complex subunit 6                      |
| 1.01                                                     | 0.0003  | O00622     | CYR61; Protein CYR61                                           |
| 1.00                                                     | 0.0141  | Q86YV9     | HPS6; Hermansky-Pudlak syndrome 6 protein                      |
| 0.94                                                     | 0.0118  | Q5QP56     | BCL2L1; Bcl-2-like protein 1                                   |
| 0.86                                                     | 0.0121  | Q02952     | AKA12; A-kinase anchor protein 12                              |
| 0.84                                                     | 0.0077  | Q02040     | AK17A; A-kinase anchor protein 17A                             |
| 0.821                                                    | 0.0010  | S4R3V8     | LSR; Lipolysis-stimulated lipoprotein receptor                 |
| -1.46                                                    | 0.0002  | Q15018     | FAM175B; BRISC complex subunit Abro1                           |
| -1.55                                                    | 0.0065  | Q92667     | AKAP1; A-kinase anchor protein 1, mitochondrial                |
| -1.60                                                    | 0.0002  | Q9Y6B6     | SAR1B; GTP-binding protein SAR1b                               |
| -1.97                                                    | 6.0E-05 | Q5HYI8     | RABL3; Rab-like protein 3                                      |
| -2.55                                                    | 0.0005  | P35580     | MYH10; Myosin-10                                               |
| -2.60                                                    | 0.0002  | Q8WUY1     | THEM6; Protein THEM6                                           |

**Supplementary Table S5.** Significant changes in relative total protein abundance levels after treatment with [<sup>177</sup>Lu]Lu-PP-F11N in A431/CCKBR cell. MS2-based quantification shown as log<sub>2</sub> ratio,  $P < 0.05$

Supplementary Table S6

| LOG <sub>2</sub> RATIO:<br>EBRT/CON | P-value | UniProt | PROTEIN                                                               |
|-------------------------------------|---------|---------|-----------------------------------------------------------------------|
| 1.55                                | 0.0032  | Q15392  | DHCR24; Delta(24)-sterol reductase                                    |
| 1.39                                | 0.0019  | H7BZV4  | ARL6IP4; ADP-ribosylation factor-like protein 6-interacting protein 4 |
| 1.32                                | 0.0131  | P23786  | CPT2; Carnitine O-palmitoyltransferase 2, mitochondrial               |
| 0.80                                | 0.0069  | E9PL01  | SPCS2; Signal peptidase complex subunit 2                             |
| 0.69                                | 0.0017  | P14927  | UQCRB; Cytochrome b-c1 complex subunit 7                              |
| 0.68                                | 0.0014  | Q9NRN7  | AASDHPPT;                                                             |
| 0.60                                | 0.0023  | Q8IZP0  | ABI1; Abl interactor 1                                                |
| -0.87027                            | 0.0091  | Q14165  | MLEC; Malectin                                                        |
| -0.89371                            | 0.0007  | Q9BVL2  | NUP58; Nucleoporin p58/p45                                            |
| -1.15661                            | 0.0062  | Q7Z4H3  | HDCC2; HD domain-containing protein 2                                 |
| -1.79024                            | 0.0001  | Q9UPN7  | PPP6R1; Serine/threonine-protein phosphatase 6 regulatory subunit 1   |
| -1.7997                             | 0.0036  | Q92882  | OSTF1; Osteoclast-stimulating factor 1                                |
| -1.83217                            | 0.0003  | Q8N983  | MRPL43; 39S ribosomal protein L43, mitochondrial                      |
| -1.90071                            | 0.0024  | Q86W92  | PPFIBP1; Liprin-beta-1                                                |
| -2.06716                            | 0.0008  | P16435  | POR; NADPH-cytochrome P450 reductase                                  |

**Supplementary Table S6.** Significant changes in relative total protein abundance levels after EBRT in A431/CCKBR cells. MS2-based quantification shown as log<sub>2</sub> ratio,  $P < 0.05$ .

**Supplementary Table S7.** Comparative analysis of cellular response to TRT with [<sup>177</sup>Lu]Lu-PP-F11N and EBRT. Bioinformatics analysis of the protein groups with altered expression or phosphorylation levels in response to PRRT or EBRT identified by proteomics and phosphoproteomics analysis. Fold Enrichments (Fold En.) for identified biological processes (GOTERM) or pathways (BIOCARTA, KEGG PATHWAYS) were scored for terms with  $P < 0.01$  in a group of at least 3 proteins.

| TRT ( <sup>177</sup> Lu-PP-F11N)                                                                                                                | P-value<br>Fold En. | EBRT                                                                                                                                                                                                                                                                         | P-value<br>Fold En. |
|-------------------------------------------------------------------------------------------------------------------------------------------------|---------------------|------------------------------------------------------------------------------------------------------------------------------------------------------------------------------------------------------------------------------------------------------------------------------|---------------------|
| <b>DNA damage response, repair and nucleus structure</b>                                                                                        |                     |                                                                                                                                                                                                                                                                              |                     |
| Cellular response to DNA damage stimulus GOTERM_BP (DDX39A, RAD18, YAP1DTL, MAPK1, TP53, UBA1, USP10)                                           | 5.0E-3<br>3.8       | Cellular response to DNA damage stimulus GOTERM_BP (APC, DDX39A, RAD18, RAD50, YAP1, AATF, CHEK1, CHEK2, RNF168, TOP2A, TP53BP1, TP53)                                                                                                                                       | 3.5E-4<br>3.8       |
| DNA damage response, signal transduction by p53 class mediator GOTERM_BP (FOXO3, TP53, USP10)                                                   | 9.6E-3<br>19.9      | DNA damage response, signal transduction by p53 class mediator GOTERM_BP (GTSE1, CHEK2, NPM1, PML, TNKS1BP1, TP53)                                                                                                                                                           | 2.5E-3<br>6.3       |
| DNA damage response, detection of DNA damage GOTERM_BP (RAD18, DTL, RFC1, RPA1)                                                                 | 5.5E-3<br>11.0      | Double-strand break repair via nonhomologous end joining GOTERM_BP (RAD50, HIST3H3, MDC1, RIF1, RNF168, TP53BP1, UIMC1)                                                                                                                                                      | 3.8E-4<br>7.3       |
| Translesion synthesis GOTERM_BP (DTL, RFC1, RPA1, USP10)                                                                                        | 5.5E-3<br>11.0      | Double-strand break repair via homologous recombination GOTERM_BP (RAD50, RAD51AP1, NUCKS1, PALB2, RPA1, SFPQ)                                                                                                                                                               | 5.3E-3<br>5.3       |
| Nucleosome assembly - GOTERM_BP (HIST1H1B, HIST1H1D, HIST2H3A, MCM2, NPM1, SART3)                                                               | 6.9E-3<br>5.0       | Base-excision repair GOTERM_BP (HUWE1, HMGA1, NTHL1, RPA1, TP53)                                                                                                                                                                                                             | 1.9E-3<br>9.4       |
| Sister chromatid cohesion GOTERM_BP (AHCTF1, RANBP2, CENPC, CENPF, KIF22, RPS27)                                                                | 3.8E-3<br>5.8       | Interstrand cross-link repair GOTERM_BP (RAD51AP1, NUCKS1, RPA1, RNF168, USP1)                                                                                                                                                                                               | 6.4E-3<br>6.7       |
| Nuclear pore complex assembly - GOTERM_BP (AHCTF1, NUP153, NUP93)                                                                               | 5.2E-3<br>27.1      | Nuclear pore complex assembly - GOTERM_BP (NUP107, NUP153, NUP98, RTN4, TPR)                                                                                                                                                                                                 | 1.6E-5<br>29.8      |
|                                                                                                                                                 |                     | DNA replication GOTERM_BP (POLE, GINS2, RAD50, UPF1, CHEK1, RRM2, CHAF1A, DUT, KAT7, MCM2, MCM4, MCM6, NFIA, NFIC, NUP98, RPA1)                                                                                                                                              | 1.4E-8<br>6.8       |
| <b>RNA processing, transport and metabolism</b>                                                                                                 |                     |                                                                                                                                                                                                                                                                              |                     |
| mRNA splicing, via spliceosome GOTERM_BP (DDX39A, POLR2A, FIP1L1, HNRNPH1, HNRNPU, RAVR1, SRRM1, SRRM2, SF3B2, SART3, TRA2A)                    | 8.1E-5<br>4.9       | mRNA splicing, via spliceosome GOTERM_BP (DDX39A, ELAVL1, POLR2A, SNW1, YBX1, CAS3, HNRNPA1, HNRNPM, NONO, PABPN1, PCBP1, RAVR1, SRRM1, SRRM2, SPEN, SYNCRIP, TRA2A, TRA2B)                                                                                                  | 5.2E-8<br>5.3       |
| mRNA export from nucleus GOTERM_BP (AGFG1, FIP1L1, DDX39A, RANBP2, NUP153, NUP50, NUP93, SRRM1)                                                 | 6.5E-5<br>7.9       | mRNA export from nucleus GOTERM_BP (DDX39A, UPF1, CAS3, NUP107, NUP153, NUP58, NUP98, SRRM1, TPR)                                                                                                                                                                            | 1.4E-4<br>5.9       |
| tRNA export from nucleus GOTERM_BP (RANBP2, NUP153, NUP50, NUP93)                                                                               | 3.9E-3<br>12.4      | tRNA export from nucleus GOTERM_BP (NUP107, NUP153, NUP58, NUP98, TPR)                                                                                                                                                                                                       | 1.3E-3<br>10.2      |
| RNA transport KEGG_PATHWAY (RANBP2, RGPD5, EIF4G1, NUP153, NUP50, NUP93, RPP30, SRRM1, TGS1)                                                    | 8.1E-4<br>4.4       | rRNA processing GOTERM_BP (ARL6IP4, DDX47, IWS1, KHSRP, RBM15B, RBMXL1, ADAR, ACIN1, CAS3, HNRNPA1, NONO, PRPF38B, SRRM1, SFPQ, THRAP3)                                                                                                                                      | 6.2E-7<br>5.5       |
| Gene silencing by RNA GOTERM_BP (RANBP2, POLR2A, HIST2H3A, NUP153, NUP50, NUP93)                                                                | 5.2E-3<br>5.4       | rRNA processing GOTERM_BP (DDX47, DDX21, DIS3L2, UTP14A, UTP18, CCDC86, DKC1, EXOSC10, NOLC1, RRP1B, RPL29)                                                                                                                                                                  | 1.6E-3<br>3.4       |
| Nuclear-transcribed mRNA catabolic process, nonsense-mediated decay GOTERM_BP (DCP1A, EIF4G1, RPL19, RPL3, RPS27, RPS6)                         | 6.9E-3<br>5.0       | Negative regulation of transcription GOTERM_BP (BCLAF1, GATAD2A, JUN, MYBBP1A, RB1, RBM15B, SNW1, SP100, ATF7IP, CBX3, CBX5, HMGA1, NONO, NACCI, PML, SPEN, SFPQ, TRIM28, TP53, UIMC1)                                                                                       | 2.3E-4<br>2.6       |
|                                                                                                                                                 |                     | RNA polymerase III transcription KEGG_PATHWAY (ADAR, NONO, SFPQ)                                                                                                                                                                                                             | 7.7E-3<br>20.3      |
|                                                                                                                                                 |                     | mRNA surveillance pathway KEGG_PATHWAY (UPF1, ACIN1, CAS3, PABPN1, PPP2R5A, SRRM1)                                                                                                                                                                                           | 9.4E-3<br>4.6       |
| <b>Cell cycle regulation</b>                                                                                                                    |                     |                                                                                                                                                                                                                                                                              |                     |
| Mitotic nuclear division GOTERM_BP (HAUS6, NSUN2, ARHGEF2, ANLN, CENPC, CENPF, KIF22, PPP1R12A, RPS6, SKA3, ZC3HC1)                             | 2.0E-4<br>4.4       | Mitotic nuclear division GOTERM_BP (DIS3L2, HAUS6, PBK, TPX2, ANLN, CDC26, CDCA3, DYNCL1L1, ENSA, NEDD1, NUMA1, NOLC1, TPR)                                                                                                                                                  | 4.2E-4<br>3.4       |
| Mitotic nuclear envelope disassembly GOTERM_BP (RANBP2, NUP153, NUP50, NUP93)                                                                   | 9.6E-3<br>9.0       | Mitotic nuclear envelope disassembly GOTERM_BP (NUP107, NUP153, NUP58, NUP98, TPR)                                                                                                                                                                                           | 4.4E-3<br>7.5       |
| Mitotic cell cycle GOTERM_BP (CENPC, CENPF, FAM175B, PAK2)                                                                                      | 7.9E-3<br>9.7       | Cell cycle GOTERM_BP (RB1, CDC26, CHEK1, CHEK2, MCM2, MCM4, MCM6, TP53)                                                                                                                                                                                                      | 1.9E-3<br>4.5       |
|                                                                                                                                                 |                     | G2/M transition of mitotic cell cycle - GOTERM_BP (HAUS6, RBM8A, TPX2, CCP110, CEP152, CHEK1, CHEK2, CLASP1, ENSA, HMMR, NEDD1, PCM1)                                                                                                                                        | 7.8E-6<br>5.7       |
|                                                                                                                                                 |                     | G1/S transition of mitotic cell cycle GOTERM_BP (POLE, RB1, MCM2, MCM4, MCM6, RPA1, RRM2)                                                                                                                                                                                    | 4.6E-3<br>4.5       |
|                                                                                                                                                 |                     | Mitotic cytokinesis GOTERM_BP (APC, RACGAP1, ANLN, CHMP4B)                                                                                                                                                                                                                   | 9.4E-3<br>9.0       |
| <b>Signal transduction pathways</b>                                                                                                             |                     |                                                                                                                                                                                                                                                                              |                     |
| TGF-beta receptor signaling pathway - GOTERM_BP (FOS, JUN, TAB1, CGN, PXN, ZYX)                                                                 | 2.3E-3<br>6.5       | Ras protein signal transduction GOTERM_BP (DHCR24, CRKL, JUN, RB1, SHC1, MAPK14, RREB1, TRIM28, TP53)                                                                                                                                                                        | 1.1E-5<br>8.4       |
| ErbB signaling pathway KEGG_PATHWAY (ABL2, JUN, SOS1, EGFR, MAPK1, PAK2)                                                                        | 3.3E-3<br>5.9       | Regulation of signal transduction by p53 class mediator GOTERM_BP (RAD50, TPX2, CHEK1, CHEK2, CHD3, CHD4, MTA2, MAPK14, PML, RPA1, TP53)                                                                                                                                     | 2.0E-5<br>5.8       |
| Angiotensin II mediated activation of JNK via Pyk2 BIOCARTA (JUN, SOS1, CALM1, EGFR, MAPK1)                                                     | 3.8E-3<br>7.2       | ATM Signaling Pathway - KEGG_PATHWAY (JUN, RAD50, CHEK1, CHEK2, TP53)                                                                                                                                                                                                        | 2.6E-3<br>8.1       |
| Signaling of Hepatocyte Growth Factor Receptor BIOCARTA (FOS, JUN, SOS1, MAPK1, PXN)                                                            | 5.3E-3<br>6.6       | Links between Pyk2 and Map Kinases - KEGG_PATHWAY (CRKL, JUN, SHC1, MAPK14, MAP2K2)                                                                                                                                                                                          | 7.6E-3<br>6.0       |
| Integrin Signaling Pathway BIOCARTA (FOS, JUN, SOS1, MAPK1, PXN)                                                                                | 5.8E-3<br>6.5       |                                                                                                                                                                                                                                                                              |                     |
| Estrogen signaling pathway - KEGG_PATHWAY (FOS, JUN, SOS1, CALM1, EGFR, MAPK1)                                                                  | 5.7E-3<br>5.1       |                                                                                                                                                                                                                                                                              |                     |
| TOR signaling GOTERM_BP (LARP1, CCDC88A, RPS6)                                                                                                  | 8.4E-3<br>21.3      |                                                                                                                                                                                                                                                                              |                     |
| MAPK signaling pathway - KEGG_PATHWAY (FOS, JUN, SOS1, TAB1, EGFR, MAPK1, PAK2, STMN1, TP53)                                                    | 8.8E-3<br>3.0       |                                                                                                                                                                                                                                                                              |                     |
| Regulation of Rho protein signal transduction GOTERM_BP (FGD1, ARHGEF1, ARHGEF5, ARHGEF2, SOS1)                                                 | 8.9E-3<br>6.1       |                                                                                                                                                                                                                                                                              |                     |
| <b>Cell morphology, adhesion and phenotype</b>                                                                                                  |                     |                                                                                                                                                                                                                                                                              |                     |
| Cell-cell adhesion GOTERM_BP (BAG3, LIMA1, LARP1, SLK, ANLN, CGN, CTTN, EIF4G1, FAM129B, LAD1, MARK2, PAK2, PFKF, PPP1R13L, RSL1D1, TJP1, TJP2) | 1.4E-8<br>6.2       | Cell-cell adhesion GOTERM_BP (AHNAK, CDC42EP1, CRKL, LASP1, MKL2, NDRG1, PDLIM1, PDLIM5, PPF1BP1, RAB1A, ARHGEF16, VAPB, ABI1, ANLN, ATXN2L, CAST, CHMP4B, CTTN, DBNL, EIF4G1, GOLGA2, HDLBP, LAD1, MARK2, PCBP1, PTPN1, RTN4, RSL1D1, RPL29, TNKS1BP1, TMPO, TJP2, ZC3HAV1) | 1.4E-19<br>8.0      |
| Regulation of actin cytoskeleton KEGG_PATHWAY (FGD1, ARHGEF1, SOS1, EGFR, ITGB4, MAPK1, PAK2, PXN, PPP1R12A)                                    | 2.9E-3<br>3.6       | Actin cytoskeleton reorganization GOTERM_BP (RICTOR, SHC1, CTTN, EPS8, PTPN1, SIPA1L1)                                                                                                                                                                                       | 7.1E-4<br>8.4       |
| Regulation of cytoskeleton organization GOTERM_BP (ARHGEF5, MARK2, MAPK1, STMN1)                                                                | 8.5E-4<br>20.9      |                                                                                                                                                                                                                                                                              |                     |
| Focal adhesion KEGG_PATHWAY (JUN, SOS1, EGFR, ITGB4, LAMB3, MAPK1, PAK2, PXN, PPP1R12A, ZYX)                                                    | 6.0E-4<br>4.1       |                                                                                                                                                                                                                                                                              |                     |
| Tight junction KEGG_PATHWAY (CGN, CLDN4, CTTN, MYH10, TJAP1, TJP1, TJP2)                                                                        | 4.9E-4<br>6.8       |                                                                                                                                                                                                                                                                              |                     |
| Cell proliferation GOTERM_BP (BCL2L1, LARP1, ARHGEF1, YAP1, CENPF, CCKBR, CYR61, DKC1, EGFR, FAM83B, MYH10, RPS27, TP53)                        | 3.2E-4<br>3.5       |                                                                                                                                                                                                                                                                              |                     |
| <b>Transport and protein modifications</b>                                                                                                      |                     |                                                                                                                                                                                                                                                                              |                     |
| Regulation of glucose transport GOTERM_BP (RANBP2, NUP153, NUP50, NUP93)                                                                        | 4.3E-3<br>12.0      | Regulation of glucose transport GOTERM_BP (NUP107, NUP153, NUP58, NUP98, TPR)                                                                                                                                                                                                | 1.5E-3<br>9.9       |
| Protein sumoylation GOTERM_BP (RANBP2, HDAC7, MDC1, NUP153, NUP50, NUP93, RPA1, TP53)                                                           | 1.7E-4<br>6.8       | Protein sumoylation GOTERM_BP (SP100, CBX8, MDC1, NUP107, NUP153, NUP58, NUP98, PML, RPA1, RNF168, TOP2A, TPR, TRIM28, TP53BP1, TP53)                                                                                                                                        | 2.8E-9<br>8.4       |
| Proteoglycans in cancer KEGG_PATHWAY (ARHGEF1, SOS1, CTTN, EGFR, MAPK1, PXN, PPP1R12A, RPS6, TP53)                                              | 2.1E-3<br>3.8       | Protein import into nucleus GOTERM_BP (ADAR, KPNA2, KPNA3, NUP107, NUP153, NUP58, PPP1R10, TPR)                                                                                                                                                                              | 2.7E-5<br>9.0       |
